1 **Evolution toward maximum transport capacity of the Ttg2 ABC system in**  
2 ***Pseudomonas aeruginosa***

3

4 Daniel Yero,<sup>1,2</sup> Lionel Costenaro,<sup>1#</sup> Oscar Conchillo-Solé,<sup>1</sup> Mireia Díaz-Lobo,<sup>3</sup> Adrià  
5 Mayo,<sup>1</sup> Mario Ferrer-Navarro,<sup>1#</sup> Marta Vilaseca,<sup>3</sup> Isidre Gibert,<sup>1,2\*</sup> Xavier Daura<sup>1,4\*</sup>

6

7 <sup>1</sup>Institut de Biotecnologia i de Biomedicina (IBB), Universitat Autònoma de Barcelona  
8 (UAB), Barcelona, Spain;

9 <sup>2</sup>Departament de Genètica i de Microbiologia, UAB, Barcelona, Spain;

10 <sup>3</sup>Institute for Research in Biomedicine (IRB Barcelona), The Barcelona Institute of  
11 Science and Technology, Barcelona, Spain;

12 <sup>4</sup>Catalan Institution for Research and Advanced Studies (ICREA), Barcelona, Spain.

13

14 \*Corresponding Authors: Xavier Daura, Tel: (+34)935868940 Email:

15 [Xavier.Daura@uab.cat](mailto:Xavier.Daura@uab.cat). Isidre Gibert, Tel: (+34)935862050 Email:

16 [Isidre.Gibert@uab.cat](mailto:Isidre.Gibert@uab.cat).

17

18 #Present address: Lionel Costenaro, Institut de Biologia Molecular de Barcelona

19 (CSIC), Barcelona, Spain. Mario Ferrer-Navarro, Teknokroma Analítica SA,

20 Barcelona, Spain.

21

22 **Abstract**

23 In *Pseudomonas aeruginosa*, Ttg2D is the soluble periplasmic phospholipid-binding  
24 component of an ABC transport system thought to be involved in maintaining the  
25 asymmetry of the outer membrane. The crystallographic structure of Ttg2D at 2.5Å  
26 resolution reveals that this protein can bind two diacyl phospholipids. Native and  
27 denaturing mass spectrometry experiments confirm that Ttg2D binds two  
28 phospholipid molecules, which may have different head groups. Analysis of the  
29 available structures of Ttg2D orthologs allowed us to classify this protein family as a  
30 novel substrate-binding protein fold and to venture the evolutionary events that  
31 differentiated the orthologs binding one or two phospholipids. In addition, gene  
32 knockout experiments in *P. aeruginosa* PAO1 and multidrug-resistant strains show  
33 that disruption of this system leads to outer membrane permeabilization. This  
34 demonstrates the role of this system in low-level intrinsic resistance against certain  
35 antibiotics that use a lipid-mediated pathway to permeate through membranes.

36

## 37 **Introduction**

38 *Pseudomonas aeruginosa* are amongst the most important multidrug-resistant (MDR)  
39 human pathogens<sup>1</sup>, showing inherent resistance to an important number of the  
40 presently available antibiotics<sup>2</sup>. *P. aeruginosa* are responsible for chronic lung  
41 infections in individuals with chronic obstructive pulmonary disease or cystic fibrosis  
42 (CF)<sup>3</sup> and account for over a tenth of all nosocomial infections<sup>4</sup>. A number of effective  
43 drugs and formulations can treat *P. aeruginosa* infections, even in CF patients<sup>5</sup>.  
44 These include frontline antibiotics such as piperazillin-tazobactam, ceftazidime,  
45 aztreonam, imipenem, meropenem, ciprofloxacin, levofloxacin, tobramycin, amikacin,  
46 and colistin<sup>6</sup>. Yet, resistance to most of these antimicrobials is being increasingly  
47 reported<sup>7</sup>. The basis for the inherently high resistance of these microorganisms is  
48 primarily their low outer-membrane (OM) permeability<sup>8, 9</sup>, complemented by the  
49 production of antibiotic-inactivating enzymes (e.g.  $\beta$ -lactamases), the constitutive  
50 expression of efflux pumps<sup>10, 11</sup> and the capacity to form biofilms<sup>1, 12</sup>, among other  
51 mechanisms. The susceptibility of *P. aeruginosa* to antimicrobials can be additionally  
52 reduced by the acquisition of inheritable traits, including horizontal gene transfers  
53 and mutations that decrease uptake and efflux pump overexpression<sup>13, 14, 15</sup>.  
54 Although a number of genes and mechanisms of resistance to antibiotics are already  
55 known in *P. aeruginosa*, the complex mechanisms controlling the basal, low-level  
56 resistance to these compounds are still poorly understood<sup>16, 17</sup>.

57

58 The OM of *P. aeruginosa* is known to be central to its antibiotic-resistance  
59 phenotype. Its intrinsically low permeability is partly determined by inefficient OM  
60 porin proteins that provide innate resistance to several antimicrobial compounds,  
61 mainly hydrophilic<sup>1, 8, 10</sup>. On the other hand, the loss of specific efflux pump

62 mechanisms, commonly overproduced in clinical isolates, is compensated by  
63 reducing the permeability of the OM<sup>9</sup>. Thus, mechanisms involved in OM  
64 organization, composition and integrity interfere with the diffusion through the  
65 membrane of antimicrobial compounds, either hydrophilic or hydrophobic. Particularly  
66 the asymmetric lipid organization of the OM is the main responsible for the low  
67 permeability to lipophilic antibiotics and detergents<sup>18</sup>.

68

69 In *Escherichia coli*, the Mla system (MlaA-MlaBCDEF) was initially proposed to have  
70 a phospholipid import function, preventing phospholipid accumulation in the outer  
71 leaflet of the OM and thus controlling membrane-phospholipid asymmetry<sup>19</sup>. The core  
72 components of this ATP-binding-cassette (ABC) transport system in the inner  
73 membrane (IM) comprise the permease (MlaE), the ATPase (MlaF) and the  
74 substrate-binding protein MlaD that are highly conserved among Gram-negative  
75 bacteria<sup>20</sup>. The MlaA component, an integral OM protein that forms a channel  
76 adjacent to trimeric porins, is thought to selectively remove phospholipids from the  
77 outer OM leaflet and transfer them to the soluble periplasmic substrate-binding  
78 protein MlaC<sup>21, 22</sup>. MlaC would then transport the phospholipids across the periplasm  
79 and deliver them to MlaD for active internalization through the IM<sup>23</sup>. Deletion of the  
80 genes of this system is known to destabilize the OM, and bacterial strains lacking any  
81 of the Mla components are more susceptible to membrane stress agents<sup>19, 24, 25, 26, 27,</sup>  
82 <sup>28, 29, 30</sup>. More recently, the retrograde transport hypothesis has been questioned and  
83 a new role for this system in anterograde phospholipid transport has been  
84 suggested<sup>29, 31</sup>.

85

86 The orthologous Mla system in *P. aeruginosa* is encoded by the PA4452-PA4456  
87 operon (locus tags corresponding to PAO1) and the isolated gene PA2800 (MlaA  
88 ortholog, also known as VacJ). Proteins encoded by this gene cluster are highly  
89 similar to those encoded by operon *ttg2* (toluene tolerance genes) in *Pseudomonas*  
90 *putida*<sup>32, 33</sup>. Although it is unlikely that organic solvents themselves are substrates of  
91 this transporter, this system was initially linked to toluene tolerance in that  
92 bacterium<sup>34</sup>. Accordingly, components of the *P. aeruginosa* ABC transporter encoded  
93 by the PA4452-PA4456 have been named Ttg2A (MlaF), Ttg2B (MlaE), Ttg2C  
94 (MlaD), Ttg2D (MlaC) and Ttg2E (MlaB)<sup>32</sup>. Recent studies of mutant strains with  
95 disrupted *ttg2* or *vacJ* genes support the contribution of this ABC transport system to  
96 the intrinsic resistance of *P. aeruginosa* to antimicrobials<sup>24, 28, 32, 35</sup>. Yet, one of these  
97 studies has challenged the role of this system in *P. aeruginosa* as an ABC importer  
98 mediating phospholipid intermembrane trafficking<sup>32</sup>.

99

100 Here, we have primarily focused on *P. aeruginosa*'s Ttg2D (Ttg2D<sub>Pae</sub>) to further study  
101 the function of the Ttg2 system in these bacteria. We present structural and  
102 functional evidence of the role of this protein as a phospholipid transporter. Our  
103 structural analysis further enriches the existing knowledge on the structural diversity  
104 of substrate-binding proteins (SBPs) and supports current discussions on the  
105 directionality of phospholipid transport by the Mla system. In addition, based on  
106 mutational studies of the *ttg2* operon, we have validated the contribution of the Ttg2  
107 system to the intrinsic basal resistance of *P. aeruginosa* to several antibiotic classes  
108 and other damaging compounds. Although the role of other components of this ABC  
109 transport system in multi-drug resistance has been already established for *P.*  
110 *aeruginosa*<sup>24, 32</sup>, this is the first study focusing on the soluble periplasmic SBP

111 component, Ttg2D<sub>Pae</sub>. Among the components of the Ttg2 system, this SPB could be  
112 the most promising candidate for an antimicrobial intervention based on the specific  
113 blocking of this trafficking pathway.

114

## 115 **Results**

### 116 **Ttg2D<sub>Pae</sub> contains a large hydrophobic cavity that binds four acyl tails**

117 Sequence analysis indicates that Ttg2D<sub>Pae</sub> (PA4453) is the soluble periplasmic SBP  
118 component of the ABC transporter encoded by the *ttg2* operon and a member of the  
119 Pfam family MlaC (PF05494). Interestingly, the available 3D structures for the MlaC  
120 family from *Ralstonia solanacearum* (PDB entry 2QGU), *P. putida* (PDB entries 4FCZ  
121 and 5UWB) and *E. coli* (PDB entry 5UWA) were all solved in complex with a ligand in  
122 their hydrophobic pocket. Electron densities for the ligand were compatible in all  
123 cases with a phospholipid, supporting their predicted role as a phospholipid  
124 transporter. A sequence alignment shows that some of the residues thought to be  
125 involved in phospholipid binding in the *R. solanacearum* Ttg2D structure are  
126 conserved in the *P. aeruginosa* ortholog (Fig. S1). Remarkably, the electron densities  
127 for *P. putida* Ttg2D revealed the presence of two diacyl lipids in its pocket.

128

129 To investigate ligand binding at the molecular level, we determined by molecular  
130 replacement the crystallographic structure of the functional unit (aa 23-215) of  
131 Ttg2D<sub>Pae</sub> at 2.53 Å resolution (PDB entry code 6HSY). The structure was refined to a  
132 final  $R_{\text{work}}$  and  $R_{\text{free}}$  of 20.9 and 24.9%, respectively, and good validation scores  
133 (Supplementary Table S1). All residues but the last three C-terminal ones (plus the  
134 C-terminal expression tag) could be modeled. Ttg2D<sub>Pae</sub> adopts a mixed  $\alpha+\beta$  fold with  
135 a highly twisted anti-parallel  $\beta$ -sheet formed by five strands and surrounded by eight

136  $\alpha$ -helices. It exhibits a “decanter” shaped structure never described before for any  
137 other protein family (Fig. 1A). The structure presents a highly hydrophobic cavity  
138 between the  $\beta$ -sheet and the helices that spans the whole protein and has a volume  
139 of 2979  $\text{\AA}^3$  and a depth of  $\sim 25$   $\text{\AA}$  (Fig. 1B). After the first refinement stage  
140 (AutoBuild), without any ligand added, clear density was visible inside the cavity that  
141 could correspond to four acyl chains (Fig. S2). We therefore modeled inside the  
142 cavity two PG(16:0/cy17:0) (Fig. 1A), as MALDI-TOF experiments revealed that this  
143 lipid was one of the most abundant among the different lipids found to bind to  
144 Ttg2D<sub>Pae</sub> when expressed in *E. coli* (see later). Real-space correlation coefficients of  
145 0.9 for the lipids indicate a good fit to the electron density  $2mF_o - DF_c$ . The four acyl  
146 tails are deeply inserted into the hydrophobic cavity, while the polar head groups are  
147 exposed to the solvent and make only few contacts with the protein (Fig. 1, A and C).  
148 This lack of specific recognition of the head group could explain why Ttg2D<sub>Pae</sub> is able  
149 to bind different types of phospholipids. The presence of two diacyl lipids suggests  
150 that the protein could also be able to bind one tetra-acyl lipid, such as cardiolipin.

151

152 To investigate the mechanism of entry and release of the two lipids in the cavity of  
153 Ttg2D<sub>Pae</sub>, we performed a normal mode analysis (NMA). NMA may be used to model  
154 the internal collective motions of a protein, for example upon ligand binding, generally  
155 described by a few low-frequency modes<sup>36</sup>. Fig. 1D shows the collective motions  
156 along mode 7, the first non-trivial mode (modes 1 to 6 account for translational and  
157 rotational motions of the protein as a whole). Rather than “en bloc” relative motions of  
158 sub-domains, all secondary structures of the protein appear to move in a concerted  
159 manner, helix  $\alpha 4$  and the core of the  $\beta$ -sheet being more rigid. This breathing-like  
160 motion increases in a concerted manner the volume of the cavity and its mouth area,

161 and may allow the lipids to enter into or exit from the cavity. Inspection of the next 10  
162 lowest-frequency normal modes shows similar concerted motions. The normal modes  
163 can be also used to compute atomic mean-square displacements, which can be in  
164 turn related to *B*-factors<sup>37</sup>. The NMA-derived and the observed (crystallographic) *B*-  
165 factors are closely correlated except in regions 75-95 and 180-200, which are  
166 involved in crystal contacts, and region 105-120, where the electron density is  
167 weaker (Fig. S3). This suggests that the normal modes provide a realistic description  
168 of the protein's flexibility.

169

### 170 **The 3D structure of Ttg2D<sub>Pae</sub> belongs to a new SBP fold**

171 The Ttg2D<sub>Pae</sub> structure is completely different from any known, non-MlaC SBP. In  
172 general, MlaC family proteins are formed by two domains with a special segment  
173 arrangement where each domain is made by non-contiguous segments of the  
174 peptide chain (Fig. 1A and S1) in a way that resembles domain dislocation<sup>38</sup>. In the  
175 “decanter” shaped structure, the first domain (D1) forms the body of the decanter and  
176 adopts a Nuclear Transport Factor 2 (NTF2)-like topology (CATH Superfamily  
177 3.10.450.50). This domain is formed by two non-contiguous sequence segments:  
178 D1S1, formed by three  $\alpha$ -helices, and D1S2, made of five  $\beta$ -strands. The second  
179 domain (D2), the decanter neck, was classified as a member of a CATH superfamily  
180 (1.10.10.640) comprising only members of the MlaC family. The D2 domain is strictly  
181 all-alpha, with five helices, and it also splits in two non-contiguous sequence  
182 segments (D2S1 and D2S2) (Fig. 1A and S1).

183

184 To confirm that MlaC family proteins constitute a new fold, we have run a DALI  
185 search against the whole PDB. This returned 800 structures, all but six containing a



186 domain of the same superfamily as D1, where the region causing the match is found.  
187 The 2OWP structure was the best non-MlaC hit. Although the reported RMSD was  
188 2.6 Å, only 99 residues were superposed (52% of Ttg2D<sub>Pae</sub>) leaving out half of the  
189 protein (all residues in D2 and some in D1). In addition, the 800 DALI results were  
190 compared to a list of 501 SBP structures previously classified in different structural  
191 clusters<sup>39</sup>. As expected, the two lists share no common fold. We superposed the  
192 Ttg2D<sub>Pae</sub> structure to a representative of each subcluster defined in the previous  
193 classification. RMSD values, number of aligned residues and structural  
194 superpositions are shown in Fig. S4. The longest match aligns 47 residues with an  
195 RMSD of 3.97 Å (2PRS chain A, a 284-residue structure member of cluster A-I),  
196 while the best RMSD is 1.41 Å with 23 residues aligned (3MQ4 chain A, a 481-  
197 residue structure member of cluster B-V). These results clearly confirm that MlaC  
198 family proteins do not belong to any previously known SBP structural cluster.

199

## 200 **Evolution of sequence and structural diversity of the MlaC family**

201 Components of the Mla system are broadly conserved in Gram-negative bacteria,  
202 except for the periplasmic MlaC that notoriously shows high inter-species sequence  
203 diversity (Fig. 2A). A structural alignment of MlaC family proteins with known 3D  
204 structures (Fig. S1 and S5) reveals that, despite sequence identities ranging from  
205 63% for the *P. putida* protein to as low as 17% for the *E. coli* one, the RMSDs of the  
206 structural alignments are very low, ranging from 1.6 to 3.1 Å (188 to 185 C $\alpha$ ),  
207 respectively (Supplementary Table S2). Clearly, the secondary structure elements  
208 are highly or strictly conserved among all four proteins, despite substantial amino-  
209 acid variations (Fig. S1 and S5). However, the four proteins split into two groups: *P.*  
210 *aeruginosa* and *P. putida* Ttg2D have a hydrophobic cavity of 2979-2337 Å<sup>3</sup> and can

211 bind two diacyl lipids, while the *R. solanacearum* and *E. coli* proteins have a half-size  
212 cavity of 1444-1332 Å<sup>3</sup> and bind only one diacyl lipid (Supplementary Table S2).  
213 Surprisingly, although the different number of ligands had been already noticed when  
214 the structure of Ttg2D from *P. putida* was solved, cavity differences were never  
215 analyzed. Fig. 1B illustrates the cavity difference between *P. aeruginosa* and *R.*  
216 *solanacearum* Ttg2D. The volume differences is correlated with a different number of  
217 residues forming the cavities, from 55 down to 31 (Supplementary Table  
218 S2) However, these residues, which are spread along the whole protein sequence  
219 (Fig. S1), are largely conserved in terms of position and, in most cases, in terms of  
220 identity or similarity also, with a few substitutions such as V147/L, or V163/I or M  
221 directly affecting the volume. Some side-chain reorientations, like Y105, and small  
222 secondary structure displacements, like strands β3 and β4 or helix α6 shifted by ~2Å  
223 (Fig. S5), also modulate the volume. Taken together these changes are,  
224 nevertheless, not sufficient to explain how the cavity volume can double. The α8 helix  
225 seems to be the crucial difference between a two and a one diacyl-phospholipid  
226 cavity, not only because the helix is longer in the first case (Fig. S1), but also  
227 because it adopts a different conformation. Indeed, for the second group (*R.*  
228 *solanacearum* and *E. coli*, one diacyl lipid), this helix has a straight conformation (Fig.  
229 1E), covers the α6 helix (Fig. S5) and does not participate in the cavity (Fig. 1B and  
230 S1), while in the first group (*P. aeruginosa* and *P. putida*, two diacyl lipids), the α8  
231 helix is bent towards and over the α7 helix and greatly enlarges the cavity (with  
232 additional residues from β4 and β5 strands). This bend occurs at the conserved  
233 G195 with an angle of 40° and 64° in Ttg2D proteins from *P. aeruginosa* and *P.*  
234 *putida*, respectively (Fig. 1E). The helix of the first protein has an additional bend of  
235 43° at K202. Glycine has a poor helix-forming propensity<sup>40</sup> and tends to disrupt

236 helices because of its high conformational flexibility. On the other hand,  
237 phenylalanine and glutamine have better helix-forming propensities and are found in  
238 the *R. solanacearum* and *E. coli* proteins, in which the  $\alpha 8$  helix is straight. In addition,  
239 W196, exclusive of the pseudomonal structures, may also contribute to the influence  
240 of the  $\alpha 8$  helix on the cavity's volume, since its bulky hydrophobic side chain, deeply  
241 inserted into a hydrophobic pocket on the concave side of the curvature could  
242 stabilize the helix  $\alpha 8$  bend (Fig. S5). Given our observations, we hypothesize that  
243 G195 and W196 could be crucial evolution amino-acid substitutions between one and  
244 two diacyl-phospholipid binding proteins and could be markers between the two  
245 groups. Interestingly, an alignment of 151 representative amino-acid sequences  
246 belonging to the MlaC family and identified across different Gram-negative species  
247 (Fig. 2A) revealed that G195 and W196 are conserved not only in *Pseudomonas*  
248 species but also in a group of related sequences in other non-phylogenetically  
249 related gamma-proteobacteria. In this group of proteins that hypothetically bind two  
250 diacyl phospholipids, other positions with distinct residues with respect to the whole  
251 MlaC family stand out, especially in two regions located between the central part  
252 (positions 65-83) and the C-terminal end (positions 154-198) of the protein (Fig. 2B).  
253 Side-chain orientation and hydrophobicity of some residues in these regions could be  
254 also contributing to a tighter binding of the two diacyl phospholipids inside the ligand  
255 cavity (Fig. S5). The presence of common protein sequence signatures in species  
256 that are not closely related indicates that horizontal gene transfer, mediated by  
257 recombination events between flanking conserved genes, could have contributed to  
258 MlaC family diversity.  
259

260 **Ttg2D<sub>Pae</sub> binds two diacyl glycerophospholipids, representing a novel**  
261 **phospholipid trafficking mechanism among Gram-negative bacteria**

262 Native mass spectrometry (MS) was used to determine the biomolecules that  
263 associate noncovalently with recombinant Ttg2D<sub>Pae</sub> and the stoichiometry of the  
264 interaction in a cellular environment (Fig. 3). The native mass spectrum of Ttg2D<sub>Pae</sub>  
265 shows a broad charge-state distribution corresponding to the protein with multiple  
266 lipids with different masses. A major charge state with MW 24289 Da (z=9)  
267 corresponds to the delipidated recombinant protein (22819 Da) and two bound  
268 phospholipids (~1469 Da) (Fig. 3A). After isolation of selected ions (m/z 2700, z=9;  
269 m/z 2430 z=10 and m/z=2208, z=11) of intact phospholipid protein complexes (wide  
270 peak ion) and corresponding gas phase fragmentation with a transfer collision energy  
271 of 50 V, we detected the delipidated protein (m/z 2537, z=9; m/z 2283, z=10 and m/z  
272 2075, z=11) and a family of released phospholipids (Fig.3B-C and S6). Major peaks  
273 at m/z 664.5, 704.5, 718.5 and 730.5 released from Ttg2D<sub>Pae</sub> confirmed the identity  
274 of these ligands as phosphatidylethanolamines (PE) with different hydrocarbon  
275 chains (PE C30:0, PE C33:1, PE C34:1 and PE C35:2 respectively) (Fig. 3C). The  
276 dissociation experiments in the gas phase in native conditions also identified as  
277 ligands of the recombinant Ttg2D<sub>Pae</sub> the major components of the bacterial  
278 membrane, phosphatidylglycerol (PG) and phosphatidylcholines (PC) (Fig. S6). In  
279 addition, released phospholipids were analyzed in positive mode denaturing  
280 conditions to ascertain their structural composition (data not shown). To characterize  
281 the largest possible number of phospholipid molecules bound by Ttg2D<sub>Pae</sub>, the lipid  
282 moiety of the recombinant protein was also analyzed by MS under denaturing  
283 conditions and negative ion mode (Fig. 3D). Using this method, PG C33:1 and PG  
284 C34:1 came out as most abundant, but PE C32:1, PE C33:1, PE C34:1, PG C30:0,

285 PG C32:1, PG C32:1, PG C35:1 and PG C36:2 were also detected (Fig. 3E). The  
286 distribution of phospholipids bound to recombinant Ttg2D<sub>Pae</sub> may depend on their  
287 relative abundances in *E. coli* (the recombinant protein-expression host), and it  
288 correlates well with the reported phospholipid composition of *E. coli* under  
289 comparable conditions<sup>41, 42</sup>. Altogether, and despite the cytoplasm of *E. coli* is clearly  
290 not the natural environment of this periplasmic protein, the total mass of the lipidated  
291 Ttg2D<sub>Pae</sub> protein determined by native MS and those of the released molecules  
292 suggests that two phospholipids with different head groups could be transporter at  
293 the same time by this ABC transporter, probably also in *P. aeruginosa*.

294

295 Binding of glycerophospholipids was also demonstrated *in vitro* by testing the ability  
296 of a purified delipidated protein to bind common membrane lipids on a membrane  
297 strip (Echelon Biosciences Inc). To obtain the delipidated protein, in-column  
298 delipidation by reverse-phase liquid chromatography was used. The removal of lipids  
299 was then confirmed by MALDI–TOF and native MS analyzes (data not shown).  
300 Incubation of delipidated Ttg2D<sub>Pae</sub> with the membrane lipid strip resulted in protein  
301 binding to phosphatidic acid (PA) and to a lesser extent cardiolipin (Fig. 3F). Ttg2D<sub>Pae</sub>  
302 did not bind to spots on the strips containing only PE or PG. This result could support  
303 the previous suggestion that Ttg2D<sub>Pae</sub> may have preference for binding two  
304 phospholipids with different head groups. It must also be taken into account that the  
305 state of the phospholipids in the spots on the membrane is far from representative of  
306 that found *in vivo*.

307

308 **The Ttg2 system provides *P. aeruginosa* with a mechanism of resistance to**  
309 **membrane-damaging agents**

310 As expected, a *P. aeruginosa*  $\Delta ttg2D$  mutant exhibited a debilitated outer membrane  
311 leading to increased susceptibility to several membrane damaging agents (Fig. 4), as  
312 demonstrated by the 1-N-phenylnaphthylamine (NPN) assay. Indeed, an  
313 enhancement in NPN uptake was observed in the mutant in the presence of the  
314 permeabilizer agents EDTA and colistin (Fig. 4, A and B). In line with this, the  $\Delta ttg2D$   
315 mutant is significantly more susceptible to the action of polymyxins (lipid-mediated  
316 uptake), but also of antibiotics that use both the lipid- and porin-mediated pathways  
317 to penetrate the cell, including fluoroquinolones, tetracyclines and chloramphenicol  
318 (Fig. 4C). With regards to polymyxin antibiotics, the *ttg2D* transposon insertion  
319 mutant was eight-fold more susceptible to colistin than the PAO1 wild-type, a colistin-  
320 susceptible reference strain (Table S3). In general, the mutation did not significantly  
321 affect the resistance phenotype displayed by the PAO1 strain to the beta-lactam  
322 antibiotics or aminoglycosides tested. The susceptibility phenotypes due to deletion  
323 of *ttg2D* could be fully or partially reverted by complementation with the cloned *ttg2D*  
324 gene or the full operon *ttg2* in the replicative broad-range vector pBBR1-MCS5 (Fig.  
325 4 and Table S3), confirming the link between the gene and the phenotypes. We have  
326 also confirmed that insertional mutations in each of the other components of the *ttg2*  
327 operon (*ttg2A*, *ttg2B*, *ttg2C*) and *vacJ* (*mIaA* ortholog) lead to an increased  
328 susceptibility to antibiotics in the same way as for the  $\Delta ttg2D$  mutant (Table S3). The  
329  $\Delta ttg2D$  mutant is also significantly susceptible to the toxic effect of the organic  
330 solvent xylene (Fig. 4D) and it is four-fold more susceptible to the chelating agent  
331 EDTA (MIC=0.5 mM) than the parental wild-type PAO1. However, no difference was  
332 observed between the mutant and wild-type cells in their susceptibility to SDS,  
333 obtaining for both strains a MIC value of 0.8%. Finally, disruption of the *ttg2D* gene  
334 resulted in an approximately two-fold reduction in biofilm formation and increased

335 notoriously the activity of EDTA against *P. aeruginosa* biofilms at a subinhibitory  
336 concentration of 0.05 mM (Fig. 4E).

337

338 **The Ttg2 system is associated to *P. aeruginosa*'s intrinsic resistance to low**  
339 **antibiotic concentrations**

340 The susceptibility of Ttg2-defective mutants to antibiotics was further studied in  
341 strains with different genetic backgrounds. To this end, the full *ttg2* operon was  
342 mutated in the clinical MDR *P. aeruginosa* strains C17, PAER-10821 and LESB58,  
343 which had shown different patterns of resistance to several antibiotic classes,  
344 specifically, polymyxins, fluoroquinolones and tetracyclines (Table 1). In particular,  
345 PAER-10821 and LESB58 are *P. aeruginosa* strains with low-level resistance to  
346 colistin. The generation of mutants with disrupted gene functions in MDR bacteria is  
347 troublesome because the antibiotics commonly used in the laboratory are no longer  
348 useful for selection of gene knockouts. In addition, the loci mutated in this case is  
349 involved in a general mechanism of resistance to antimicrobial agents and mutant  
350 strains are therefore expected to be generally susceptible and thus potentially lost  
351 during the selection steps. For this reason we have adapted a mutagenesis system  
352 based on the homing endonuclease I-SceI<sup>43, 44</sup> to construct targeted, non-polar,  
353 unmarked gene deletions in MDR *P. aeruginosa* strains (see material and methods,  
354 text S1 and Fig. S7 for details). With this modified mutagenesis strategy we have  
355 obtained and validated unmarked deletion mutants of the selected MDR strains  
356 lacking the full *ttg2* operon (Fig. S7). Complemented strains were also obtained by  
357 transformation of mutant strains with a replicative plasmid containing the full *ttg2*  
358 operon and its expression in the complemented clones was confirmed by RT-PCR

359 (Fig. S7). All these strains were tested for their susceptibilities to different classes of  
360 antibiotics (Table 1).

361

362 The three *ttg2* mutants were significantly more sensitive (between 4- and 64-fold)  
363 than the corresponding wild-type bacteria to colistin, fluoroquinolones, and  
364 tetracycline analogues, but not to the other antibiotic classes (Table 1). The mutant  
365 susceptibility phenotypes could be reverted by providing an intact copy of the entire  
366 PAO1 *ttg2* operon (PA4456-PA4452) in a replicative plasmid, except for colistin. The  
367 lack of complementation of the colistin susceptibility phenotype could be due to the  
368 effect of the antibiotic erythromycin (used as a selection marker for complemented  
369 strains) on the expression of global regulators that may influence colistin  
370 susceptibility<sup>45, 46</sup> or to the overexpression of the *ttg2* operon components (two- to  
371 eight-fold with respect to wild type, see Fig. S7) that may also affect the distribution  
372 of phospholipids in the OM. Surprisingly, the susceptibility to amikacin significantly  
373 decreased for the C17 mutant and an opposite effect was observed for the LESB58  
374 mutant and tobramycin, suggesting a genetic-background component in the effect of  
375 the *ttg2* mutation on the susceptibility to these antibiotics.

376

## 377 **Discussion**

378 Here, we report a structural and functional study of the soluble periplasmic SBP of  
379 the Ttg2 ABC transport system in *P. aeruginosa* (Ttg2D<sub>Pae</sub>) that reveals new facets of  
380 this protein family and provides additional insight into the role of this pathway in *P.*  
381 *aeruginosa*. We have first characterized this protein at the molecular level, supporting  
382 its predicted role as a phospholipid transporter. Early studies of the ortholog Mla  
383 system in *E. coli* indicated that Mla is one of the systems responsible for the



384 maintenance of lipid asymmetry in the Gram-negative OM, by retrograde trafficking of  
385 phospholipids from the OM to the cytoplasm through the IM<sup>19</sup>. The crystal structure of  
386 recombinant Ttg2D<sub>Pae</sub> (Fig. 1) shows that it binds four acyl chains. Although we  
387 cannot rule out the transport of tetra-acyl species like cardiolipin, our crystallographic  
388 data, supported by MS studies, suggests the presence of two phospholipids in the  
389 crystal. Reevaluation of the Ttg2D structure from *P. putida* (PDB 4FCZ) by Ekiert et  
390 al.<sup>26</sup> (PDB 5UWB) had also suggested the presence of a tetra-acyl, cardiolipin-like  
391 lipids in its hydrophobic pocket. In addition, *in vitro* binding studies of Ttg2D<sub>Pae</sub> to  
392 cardiolipin reinforces the hypothesis that in *P. aeruginosa* this system also  
393 participates in cardiolipin transport (Fig. 3). This is in contrast to the orthologs from *E.*  
394 *coli* (PDB 5WA) and *R. solanacearum* (PDB 2QGU), which bind a single  
395 diacylglyceride. This indicates that, among Gram-negative bacteria, the ability of  
396 MlaC family proteins to transport two molecules at the same time is exclusive to  
397 some taxonomic groups. Phylogenetic and sequence analysis (Fig. 2), using G195  
398 and W196 as signature for the larger cavity, suggest that there are other genera in  
399 addition to *Pseudomonas* where the Mla system transports two molecules  
400 simultaneously. This finding raises the question whether the evolution of this system  
401 in these species has been driven by transport efficiency (double cargo) or transport  
402 diversity (tetra-acyl in addition to diacyl phospholipids). Furthermore, are the two  
403 phospholipids translocated simultaneously by the permease Ttg2B, as it would need  
404 to be for a tetra-acyl phospholipid such as cardiolipin? The determination of the  
405 structure of additional transport components in other species will be necessary to  
406 corroborate our proposed classification and answer these questions. In addition, our  
407 results suggest that Ttg2D<sub>Pae</sub> may be also able to carry PA (Fig. 3). Although not an  
408 abundant lipid constituent in bacteria, PA is an important intermediate in the

409 biosynthesis of phospholipids, participates in phospholipid recycling and is a  
410 signaling molecule<sup>47, 48</sup>. However, high-affinity binding to PA could be an artifact of  
411 the method, possibly due to the way phospholipids are immobilized on hydrophobic  
412 membrane strips, since this class of phospholipid was not identified by MS.

413

414 Operon *ttg2* resembles the classic organization of an ABC importer<sup>49</sup>. Unlike most of  
415 the ABC exporters, ABC importers in Gram-negative bacteria require periplasmic  
416 SBPs that provide specificity and high-affinity. In addition, it is widely accepted that  
417 the direction of substrate transport of ABC transporters can be predicted on the basis  
418 of both the sequence of the nucleotide-binding component (ATPase)<sup>49, 50</sup> and the  
419 transmembrane-domain fold of the permease component<sup>51</sup>. The close orthologs in *E.*  
420 *coli* and *Mycobacterium tuberculosis* of the *P. aeruginosa* ATPase Ttg2A, MlaF (60%  
421 identity) and the Mce protein, Mkl (40% identity), respectively, have sequence  
422 signatures typically found in prokaryotic ABC import cassettes<sup>19, 49</sup>. The remote  
423 homolog TGD3 from *Arabidopsis thaliana* is also a component of an ABC transport  
424 system (TGD) that imports phosphatidic acid to the chloroplasts through its outer and  
425 inner envelopes<sup>52</sup>. On the other hand, structural similarity searches for the  
426 *Acinetobacter baumannii* MlaE protein (Ttg2B, PDB 6IC4 chains G and H)<sup>29</sup> (data not  
427 shown), identified as best match a structure of the human ABCA1 (PDB 5XJY), a  
428 known ATP-binding cassette phospholipid exporter<sup>53</sup>. In a recent study, and based  
429 on results on a Ttg2A mutant, the function of the Ttg2 system in *P. aeruginosa* was  
430 associated with the export of antibiotics such as tetracycline out of the cell<sup>32</sup>.  
431 Although, in our opinion, the Ttg2 system does not play a role as an antibiotic efflux  
432 mechanism, as proposed by these authors, the structural similarity of the permease  
433 to human export permeases suggests we should not rule out the possibility of

434 anterograde, in addition to retrograde, phospholipid trafficking. One possibility would  
435 be that of a countercurrent model<sup>54</sup>, in which different types of phospholipids would  
436 exchange between the two membranes obeying to a gradient (Fig. 5). A  
437 countercurrent model would explain how asymmetries in lipid distribution in the two  
438 membranes might be achieved<sup>54</sup>. Although genetic and functional evidences have  
439 mainly suggested that the Ttg2/Mla pathway is a retrograde transport system<sup>19, 55, 56</sup>,  
440 recent studies in *E. coli* have shown that MlaD spontaneously transfers phospholipids  
441 to MlaC *in vitro*<sup>31, 57</sup>.

442

443 MS analyses (Fig. 3) show that purified recombinant Ttg2D<sub>Pae</sub> is indeed able to bind  
444 phospholipids of different chain lengths and degree of unsaturation. In addition, they  
445 indicate that this transporter may simultaneously load two phospholipids with different  
446 head groups, particularly a PG and a PE. Therefore, this system would not only  
447 control the global phospholipid content of the OM, but may also control its  
448 phospholipid composition. We have provided additional evidence, based on the NPN-  
449 uptake assay, that the Ttg2 system controls the permeability of the OM (Fig. 4).  
450 Bacterial cells tightly regulate the phospholipid composition of the OM to fortify the  
451 permeability barrier against small toxic molecules, including antibiotics. For example,  
452 anionic phospholipids like PG interact with membrane proteins and cationic  
453 antibiotics in ways that zwitterionic phospholipids like PE do not; their balance  
454 requiring a fine control<sup>18, 58</sup>. Indeed, the membrane's PE content is a major factor  
455 determining the bacterial susceptibility to certain antimicrobial agents<sup>58, 59</sup>. In the case  
456 of positively charged antimicrobial peptides and polymyxins, it has been proposed  
457 that they promote the clustering of anionic lipids leading to phase-boundary defects  
458 that transiently breach the permeability barrier of the cell membrane<sup>58</sup>. In *P.*

459 *aeruginosa*, an organism showing significant intrinsic resistance to certain antibiotics,  
460 the membrane PE/PG composition is approximately 60-80%/18-21%<sup>58, 60</sup>.  
461 Simultaneous transport of two different phospholipids across cell membranes could  
462 help control membrane charge balance and to prevent the appearance of  
463 phospholipid clusters or domains with equal charge.

464

465 Cellular studies showed that deletion of Ttg2D in *P. aeruginosa* specifically increases  
466 the susceptibility to polymyxin, fluoroquinolone, chloramphenicol and tetracycline  
467 antibiotics in the PAO1 reference strain and in three MDR clinical strains (Table 1).  
468 This mutated phenotype was observed both in the presence and absence of specific  
469 resistance mechanisms providing high-level resistance. For example, PAO1 is a  
470 relatively sensitive strain and LESB58 is a MDR strain, and both show diversity in  
471 their resistomes<sup>61</sup>. Thus, for the strain and antibiotic panel considered, the increase  
472 in susceptibility upon *ttg2* deletion seems to correlate with the antibiotic class rather  
473 than with the genetic background. This is in line with the physico-chemical properties  
474 of these antimicrobial compounds. Albeit positively charged, colistin is a significantly  
475 hydrophobic antibiotic that appears to gain access to the IM by permeating through  
476 the OM bilayer, while tetracyclines, chloramphenicol and quinolones use a lipid-  
477 mediated or a porin-mediated pathway depending on protonation state<sup>62</sup>. These  
478 antibiotic classes are classified within the same group of molecules according to their  
479 interactions with the cell permeability barriers<sup>9</sup>. The fact that other relatively  
480 hydrophobic antibiotics such as aminoglycosides are unaffected by the disruption of  
481 the Ttg2 system speaks in favor of the observed correlation between membrane  
482 phospholipid content and specific susceptibility to certain antibiotics<sup>58, 59</sup>. Another  
483 hypothesis that would explain the different impact of Ttg2 disruption on different

484 antibiotic classes would be the possibility that components of the Ttg2 system may  
485 interact with or stabilize certain efflux pumps in *P. aeruginosa*. Indeed, the protein  
486 composition of the OM can also have a strong impact on the sensitivity of bacteria to  
487 the different antibiotic classes<sup>62</sup>. This aspect, however, requires further investigation.

488

489 Colistin is considered a last-resort antibiotic for the treatment of infections by several  
490 MDR Gram-negative pathogens, but its use against MDR *P. aeruginosa* is  
491 increasingly impeded by colistin resistance<sup>63</sup>. A variety of gene mutations are known  
492 to cause resistance to colistin by altering the OM of Gram-negative bacteria, for  
493 example, by covalent modification of the lipid A constituent of LPS as consequence  
494 of mutations in the PhoP/PhoQ two component regulatory system<sup>64, 65</sup>. In *P.*  
495 *aeruginosa*, the PhoP/PhoQ system plays a role in the induction of resistance to  
496 polymyxins in response to limiting divalent cations, as well as in virulence<sup>66, 67</sup>.  
497 Interestingly, this system has been recently identified as a regulator of *P.*  
498 *aeruginosa*'s *ttg2* operon<sup>32</sup>. More recently, nucleotide polymorphisms conferring  
499 resistance to polymyxins have been detected in genes of the Mla pathway in *A.*  
500 *baumanni*<sup>55</sup>. Although data on the precise mechanisms of resistance are scant and  
501 appear to be dependent on specific regulatory systems<sup>66, 68</sup>, the activity of the Ttg2  
502 system on membrane phospholipid homeostasis appears to be partly responsible for  
503 the lower basal susceptibility of *P. aeruginosa* to colistin.

504

505 The proposed function of the Ttg2/Mla pathway in membrane remodeling provides a  
506 plausible explanation for the pleiotropic resistance phenotypes shown by the *ttg2*  
507 mutants in this study, including resistance to various antibiotics, chelating agents and  
508 organic solvents. In addition, these mutations increase the deleterious effect of

509 antibiofilm agents like EDTA, a substance with known low activity against biofilms of  
510 *P. aeruginosa* PAO1<sup>69</sup>. Mutations in orthologous *ttg2* genes in other Gram-negative  
511 organisms have been shown to affect diverse physiological process, mainly  
512 associated with an increased OM permeability. In *E. coli*, the mutants defective in  
513 components of the Mla system rendered cells more susceptible to the lethal action of  
514 quinolones, the detergent SDS and EDTA<sup>19, 70</sup>. Mutants for the orthologs of the Ttg2  
515 pathway in both *Shigella flexneri* and *Francisella novicida* resulted also in increased  
516 sensitivity to lysis by SDS<sup>25, 71</sup>. In addition, in *S. flexneri* this pathway appears to play  
517 a role in the intercellular spread of the bacteria between adjacent epithelial cells<sup>25</sup>. In  
518 fact, the Ttg2/Mla pathway has proven to be an important virulence factor in other  
519 pathogens, like *Burkholderia pseudomallei*, that need to spread into neighboring cells  
520 to infect eukaryotic tissues<sup>72</sup>. In *Burkholderia cepacia* complex species *mla* genes are  
521 required for swarming motility and serum resistance<sup>28</sup>. Furthermore, in nontypeable  
522 *Haemophilus influenzae* (NTHi), it is considered a key factor for bacterial survival in  
523 the human airway upon exposure to hydrophobic antibiotics<sup>27</sup>. In *S. flexneri*, *B.*  
524 *pseudomallei* and NTHi the role of the *mla* operon in virulence has been inferred from  
525 mutants for the gene *vacJ* (*mIaA*)<sup>72, 73</sup>. This gene is predicted to be part of the Ttg2  
526 ABC transport system, since it is found in an operon with *ttg2* homologs in other  
527 bacteria<sup>20</sup>. While *P. aeruginosa*'s *vacJ* gene is located outside the *ttg2* operon, we  
528 have data demonstrating that strains lacking this gene share the same phenotype  
529 shown by *ttg2* mutants. In agreement with our work, it has been previously shown  
530 that in *P. aeruginosa*, VacJ plays an important role in both virulence and antibiotic  
531 susceptibility to ciprofloxacin, chloramphenicol and tetracycline<sup>74</sup>. In *E. coli*, this  
532 protein forms an active complex with the outer membrane proteins OmpC and  
533 OmpF<sup>21, 23, 75</sup>. However, in *P. aeruginosa* there are no clear orthologs to either of

534 these porins, increasing the singular characteristics of this system in this species and  
535 suggesting potential mechanistic differences with the more studied *E. coli* transporter  
536 (Fig. 5).

537

## 538 **Methods**

### 539 **Bacterial strains**

540 All bacterial strains used in this study are provided in supplementary Table S4 and  
541 growth conditions in supplementary Text S1.

542

### 543 **Ttg2D (PA4453) structure resolution**

544 Recombinant Ttg2D from *P. aeruginosa* was obtained in *Escherichia coli* BL21(DE3)  
545 and was purified to >99% purity. The recombinant protein obtained is tagged with a  
546 6-histidine tail. Detailed methods for protein production, crystallization, data collection  
547 and structure refinement are available in supplementary Text S1. The data collection,  
548 processing, and refinement statistics are given in supplementary Table S1. Atomic  
549 coordinates and structure factors have been deposited in the PDB with entry code  
550 6HSY.

551

### 552 **Native mass spectrometry analysis and identification of abundant** 553 **phospholipids**

554 Native MS experiments were performed using a Synapt G1-HDMS mass  
555 spectrometer (Waters, Manchester, UK) at the Mass Spectrometry Core Facility of  
556 IRB Barcelona. Prior to the analysis, samples were desalted with 100 mM ammonium  
557 acetate on centricon micro concentrator. Samples were infused by automated chip-  
558 based nanoelectrospray using a Triversa Nanomate system (Advion BioSciences,

559 Ithaca, NY, USA) as the interface. See supplementary material (Text S1) for method  
560 details. Fragmentation of representative abundant glycerophospholipids released  
561 from Ttg2D<sub>Pae</sub> was done under denaturing MS conditions (non-native). For  
562 denaturation, MS samples were directly injected to LTQ-FT Ultra mass spectrometer  
563 (Thermo Scientific, USA) using the Triversa Nanomate system. The NanoMate  
564 aspirated the samples from a 384-well plate (protein Lobind) with disposable,  
565 conductive pipette tips, and infused the samples through the nanoESI Chip (which  
566 consists of 400 nozzles in a 20x20 array) towards the mass spectrometer. Spray  
567 voltage was 1.75 kV and delivery pressure was 0.50 psi. Capillary temperature,  
568 capillary voltage and tube lens were set to 200°C, 35 V and 100 V, respectively. MS1  
569 and MS2 spectra were acquired at 100 k resolution. Isolated ions were fragmented  
570 by CID (collision induced dissociation) with CE (collision energy) of 30 eV.

571

### 572 **Lipid extraction from purified recombinant protein Ttg2D and phospholipid** 573 **identification**

574 Lipid extraction from purified recombinant protein was performed according to a  
575 slightly modified version of the method described by Bligh and Dyer<sup>76</sup>. Briefly, 90 µl of  
576 deionized water and 750 µl of 1:2 (v/v) CHCl<sub>3</sub>:CH<sub>3</sub>OH were added to 110 µl of protein  
577 solution (~0.5 mg ml<sup>-1</sup> protein concentration) and the mixture was vortexed. After  
578 addition of 250 µl of CHCl<sub>3</sub> and 250 µl of water, the mixture was vortexed again for 1  
579 min and centrifuged at 1000 rpm for 5 min to give a two-phase system. The bottom  
580 phase containing the phospholipids was carefully recovered and washed with 450 µl  
581 of “authentic upper phase”. The washed bottom phase was dried in a vacuum  
582 centrifuge and dissolved in 100 µl of CHCl<sub>3</sub> for matrix-assisted laser  
583 desorption/ionization time of flight (MALDI–TOF) MS analyses. As control, an



584 unrelated bacterial recombinant protein, produced with the same expression system,  
585 was subjected to identical extraction protocol.

586

587 Two microliters of lipid extract were mixed with 2  $\mu$ l of 9-aminoacridine (10 mg ml<sup>-1</sup>  
588 dissolved in a 60:40 (v/v) isopropanol:acetonitrile solution) as MALDI matrix and 1  $\mu$ l  
589 of the mixture was spotted on a ground steel plate (Bruker Daltonics, Bremen,  
590 Germany). MALDI-MS analyses were performed on an UltrafleXtreme (Bruker  
591 Daltonics) and were recorded in the reflectron negative ion mode. The ion  
592 acceleration was set to 20 kV. The spectra were processed using Flex Analysis 3.4  
593 software (Bruker Daltonics) and they were analyzed in a mass range between m/z  
594 450 and m/z 1,500 Da. The identification of *E. coli* phospholipids present in the  
595 sample was done according to Oursel *et al.*, 2007<sup>41</sup> and Gidden *et al.*, 2009<sup>42</sup>, using  
596 Lipidomics Gateway (<http://www.lipidmaps.org>) based on the m/z values of MS  
597 spectra.

598

#### 599 **Delipidation of purified recombinant Ttg2D**

600 Recombinant protein, diluted 1:1 with 1% TFA, was delipidated using an HPLC  
601 system and a C18 column (Phenomenex Jupiter 5U C18 300A) in 0.1% TFA. Protein  
602 was eluted with a gradient of acetonitrile, 0.1% TFA (monitored at 214 and 280 nm)  
603 and its delipidation was checked by both MALDI-TOF and native MS analyses.  
604 Delipidated protein was lyophilized, and typically resuspended in 100 mM NaCl, 10  
605 mM Tris-HCl (pH 8.5), to counteract the acidity of TFA, before exchanging the buffer  
606 to the desired one. Lipids bound to the column were washed out with a gradient of  
607 water-ethanol.

608

## 609 **Screen to identify membrane lipids binding specifically to Ttg2D**

610 Membrane lipid strips (P-6002) were purchased from Echelon Biosciences. First, the  
611 lipid membranes were blocked in 3% (w/v) BSA in wash buffer (10 mM Tris pH 8.0,  
612 150 mM NaCl, 1% Tween 20%) for one hour at room temperature. Second, purified  
613 delipidated recombinant Ttg2D was added in blocking buffer at a final concentration  
614 of 5 µg/ml and incubated for one hour at room temperature followed by three washes  
615 with wash buffer. As control, lipid-bound recombinant Ttg2D was used. Third, lipid  
616 membranes were incubated with a 6x-His tag polyclonal antibody HRP conjugate  
617 (MA1-21315, ThermoFisher) in blocking buffer for one hour at room temperature  
618 followed by three washes with wash buffer. Finally, the membranes were processed  
619 for enhanced chemiluminescence detection (ECL Prime Western Blotting Detection  
620 Kit) and a fluorescent image analyzer was used to detect the chemiluminescence.

621

## 622 **Generation of markerless *ttg2* mutants in MDR *P. aeruginosa* strains and** 623 **complementations**

624 Markerless *P. aeruginosa* mutants were constructed using a modification of the  
625 pGPI-Scel/pDAI-Scel system (Fig. S7) originally developed for bacteria of the genus  
626 *Burkholderia* and other MDR Gram-negative organisms<sup>44, 77</sup>. The bacterial strains  
627 and plasmids of the pGPI-Scel/pDAI-Scel system were kindly donated by Uwe  
628 Mamat (Leibniz-Center for Medicine and Biosciences, Research Center Borstel,  
629 Borstel, Germany) with permission of Miguel A. Valvano (Center for Infection and  
630 Immunity, Queen's University, Belfast, UK). The pGPI-Scel-XCm plasmid<sup>43</sup> was first  
631 modified to facilitate the generation of *ttg2* mutants in MDR *P. aeruginosa* strains.  
632 Plasmid modifications include replacement of the chloramphenicol resistance  
633 cassette by an erythromycin resistance cassette and deletion of a DNA region

634 containing the Pc promoter found in *P. aeruginosa* class 1 integrons (Text S1 and  
635 supplementary Table S4 for details). The sequence of the new suicide plasmid  
636 vector, pGPI-SceI-XErm, is available through GenBank under the accession number  
637 KY368390. For complementation in PAO1, full *ttg2* operon or the codifying region of  
638 the *ttg2D* gene were cloned into the broad-host-range cloning vector pBBR1MCS-5  
639 or a variant thereof containing the arabinose promoter, respectively (Table S4). For  
640 complementation experiments in MDR strains, the cloning vector pBBR1MCS-5 was  
641 first modified to confer resistance to erythromycin (see details in Text S1). Sequence  
642 for the new cloning vector, pBBR1MCS-6 is available through GenBank under the  
643 accession number KY368389. Complemented strains were obtained by transforming  
644 mutant cells with the corresponding pBBR1MCS derivative plasmid. The expression  
645 of *ttg2D* in mutant and complemented strains was verified by reverse transcription-  
646 PCR (RT-PCR) and quantitative real-time RT-PCR analysis (Text S1 and Fig. S7).

647

#### 648 **Outer membrane permeabilization assay**

649 Fluorometric assessment of outer membrane permeabilization was done by the 1-*N*-  
650 phenyl-naphthylamine (NPN) uptake assay as described by Loh et al.<sup>78</sup> with  
651 modifications (Text S1). Since *P. aeruginosa* PAO1 cells have proven to be poorly  
652 permeable to NPN<sup>9</sup>, either EDTA (0.2 mM) or colistin (10 µg ml<sup>-1</sup>) was added to cells  
653 to enhance uptake and fluorescence.

654

#### 655 **Susceptibility to antibiotics and membrane-damaging agents**

656 Antimicrobial susceptibility to a range of antibiotics was tested by determination of  
657 the minimum inhibitory concentration (MIC) using the broth microdilution method or  
658 Etest (Biomérieux) strips, following the Clinical and Laboratory Standards Institute

659 (CLSI) guidelines<sup>79, 80</sup> and manufacturer's instructions, respectively (see Text S1 for  
660 details). MIC differences higher than 2-fold were considered significant changes in  
661 antibiotic susceptibility. Low-level, basal resistance to a given antibiotic was defined  
662 as that of an organism lacking acquired mechanisms of resistance to that antibiotic  
663 and displaying a MIC above the common range for the susceptible population<sup>81</sup>.  
664 Clinical susceptibility breakpoints against *Pseudomonas sp.* for selected antibiotics  
665 have been established by EUCAST<sup>82</sup>. Tolerance to organic solvents and SDS/EDTA  
666 was assessed using solvent overlaid-solid medium and MIC assays, respectively  
667 (Text S1).

668

#### 669 **Biofilm formation**

670 Biofilm quantification in 96-well microtiter plate by the crystal violet assay was done  
671 as previously described<sup>83</sup> with modifications (supplementary Text S1).

672

#### 673 **Bioinformatic analysis**

674 Details are provided in the supplementary Text S1.

675

#### 676 **Acknowledgements**

677 This work has been supported by funding under the Seventh Research Framework  
678 Programme of the European Union (ref. HEALTH-F3-2009-223101) and the Spanish  
679 Ministry of Science, Innovation and Universities (ref. BIO2015-66674-R). The funders  
680 had no role in study design, data collection and interpretation, or the decision to  
681 submit the work for publication. We acknowledge the European Synchrotron  
682 Radiation Facility for provision of synchrotron radiation facilities and thank the staff of

683 ID23-1 for assistance in using the beamline. Part of the mass spectrometry  
684 experiments were performed at UAB's proteomics facility SePBioEs.

685

## 686 **Contributions**

687 DY, LC, OCS, AM, MDL, MFN and MV conducted the experiments; DY, LC, OCS,  
688 MV, IG and XD designed the experiments and participated in the analysis and  
689 interpretation of experimental data; DY, LC and OCS wrote the paper; MV, IG and  
690 XD supervised research and revised the manuscript.

691

## 692 **Competing interests**

693 The authors declare no competing interests.

694

## 695 **References**

- 696 1. Breidenstein EB, de la Fuente-Nunez C, Hancock RE. *Pseudomonas aeruginosa*: all  
697 roads lead to resistance. *Trends Microbiol* **19**, 419-426 (2011).  
698
- 699 2. Karaiskos I, Giamarellou H. Multidrug-resistant and extensively drug-resistant  
700 Gram-negative pathogens: current and emerging therapeutic approaches. *Expert*  
701 *Opin Pharmacother* **15**, 1351-1370 (2014).  
702
- 703 3. Gomez MI, Prince A. Opportunistic infections in lung disease: *Pseudomonas*  
704 infections in cystic fibrosis. *Curr Opin Pharmacol* **7**, 244-251 (2007).  
705
- 706 4. Driscoll JA, Brody SL, Kollef MH. The epidemiology, pathogenesis and treatment  
707 of *Pseudomonas aeruginosa* infections. *Drugs* **67**, 351-368 (2007).  
708
- 709 5. Waters V, Smyth A. Cystic fibrosis microbiology: Advances in antimicrobial  
710 therapy. *J Cyst Fibros*, (2015).  
711
- 712 6. Wagner S, *et al.* Novel Strategies for the Treatment of *Pseudomonas aeruginosa*  
713 Infections. *J Med Chem* **59**, 5929-5969 (2016).  
714
- 715 7. Sader HS, Farrell DJ, Flamm RK, Jones RN. Antimicrobial susceptibility of Gram-  
716 negative organisms isolated from patients hospitalised with pneumonia in US and  
717 European hospitals: results from the SENTRY Antimicrobial Surveillance  
718 Program, 2009-2012. *Int J Antimicrob Agents* **43**, 328-334 (2014).  
719

- 720 8. Nicas TI, Hancock RE. Pseudomonas aeruginosa outer membrane permeability:  
721 isolation of a porin protein F-deficient mutant. *J Bacteriol* **153**, 281-285 (1983).  
722
- 723 9. Krishnamoorthy G, Leus IV, Weeks JW, Wolloscheck D, Rybenkov VV, Zgurskaya  
724 HI. Synergy between Active Efflux and Outer Membrane Diffusion Defines Rules  
725 of Antibiotic Permeation into Gram-Negative Bacteria. *MBio* **8**, (2017).  
726
- 727 10. Strateva T, Yordanov D. Pseudomonas aeruginosa - a phenomenon of bacterial  
728 resistance. *J Med Microbiol* **58**, 1133-1148 (2009).  
729
- 730 11. Webber MA, Piddock LJ. The importance of efflux pumps in bacterial antibiotic  
731 resistance. *J Antimicrob Chemother* **51**, 9-11 (2003).  
732
- 733 12. Lyczak JB, Cannon CL, Pier GB. Lung infections associated with cystic fibrosis. *Clin*  
734 *Microbiol Rev* **15**, 194-222 (2002).  
735
- 736 13. Wiegand I, Marr AK, Breidenstein EB, Schurek KN, Taylor P, Hancock RE. Mutator  
737 genes giving rise to decreased antibiotic susceptibility in Pseudomonas  
738 aeruginosa. *Antimicrob Agents Chemother* **52**, 3810-3813 (2008).  
739
- 740 14. Tanimoto K, Tomita H, Fujimoto S, Okuzumi K, Ike Y. Fluoroquinolone enhances  
741 the mutation frequency for meropenem-selected carbapenem resistance in  
742 Pseudomonas aeruginosa, but use of the high-potency drug doripenem inhibits  
743 mutant formation. *Antimicrob Agents Chemother* **52**, 3795-3800 (2008).  
744
- 745 15. Muller C, Plesiat P, Jeannot K. A two-component regulatory system interconnects  
746 resistance to polymyxins, aminoglycosides, fluoroquinolones, and beta-lactams in  
747 Pseudomonas aeruginosa. *Antimicrob Agents Chemother* **55**, 1211-1221 (2011).  
748
- 749 16. Murray JL, Kwon T, Marcotte EM, Whiteley M. Intrinsic Antimicrobial Resistance  
750 Determinants in the Superbug Pseudomonas aeruginosa. *MBio* **6**, e01603-01615  
751 (2015).  
752
- 753 17. Moradali MF, Ghods S, Rehm BH. Pseudomonas aeruginosa Lifestyle: A Paradigm  
754 for Adaptation, Survival, and Persistence. *Front Cell Infect Microbiol* **7**, 39 (2017).  
755
- 756 18. Bishop RE. Emerging roles for anionic non-bilayer phospholipids in fortifying the  
757 outer membrane permeability barrier. *J Bacteriol* **196**, 3209-3213 (2014).  
758
- 759 19. Malinverni JC, Silhavy TJ. An ABC transport system that maintains lipid  
760 asymmetry in the gram-negative outer membrane. *Proc Natl Acad Sci U S A* **106**,  
761 8009-8014 (2009).  
762
- 763 20. Roier S, *et al.* A novel mechanism for the biogenesis of outer membrane vesicles  
764 in Gram-negative bacteria. *Nat Commun* **7**, 10515 (2016).  
765
- 766 21. Abellon-Ruiz J, *et al.* Structural basis for maintenance of bacterial outer  
767 membrane lipid asymmetry. *Nat Microbiol* **2**, 1616-1623 (2017).  
768

- 769 22. Yeow J, *et al.* The architecture of the OmpC-MlaA complex sheds light on the  
770 maintenance of outer membrane lipid asymmetry in *Escherichia coli*. *J Biol Chem*  
771 **293**, 11325-11340 (2018).  
772
- 773 23. Thong S, *et al.* Defining key roles for auxiliary proteins in an ABC transporter that  
774 maintains bacterial outer membrane lipid asymmetry. *eLife* **5**, (2016).  
775
- 776 24. McDaniel C, *et al.* A Putative ABC Transporter Permease Is Necessary for  
777 Resistance to Acidified Nitrite and EDTA in *Pseudomonas aeruginosa* under  
778 Aerobic and Anaerobic Planktonic and Biofilm Conditions. *Frontiers in*  
779 *Microbiology* **7**, (2016).  
780
- 781 25. Carpenter CD, *et al.* The Vps/VacJ ABC transporter is required for intercellular  
782 spread of *Shigella flexneri*. *Infect Immun* **82**, 660-669 (2014).  
783
- 784 26. Ekiert DC, *et al.* Architectures of Lipid Transport Systems for the Bacterial Outer  
785 Membrane. *Cell* **169**, 273-285 e217 (2017).  
786
- 787 27. Fernandez-Calvet A, *et al.* Modulation of *Haemophilus influenzae* interaction with  
788 hydrophobic molecules by the VacJ/MlaA lipoprotein impacts strongly on its  
789 interplay with the airways. *Sci Rep* **8**, 6872 (2018).  
790
- 791 28. Bernier SP, Son S, Surette MG. The Mla Pathway Plays an Essential Role in the  
792 Intrinsic Resistance of *Burkholderia cepacia* Complex Species to Antimicrobials  
793 and Host Innate Components. *J Bacteriol* **200**, (2018).  
794
- 795 29. Kamischke C, *et al.* The *Acinetobacter baumannii* Mla system and  
796 glycerophospholipid transport to the outer membrane. *eLife* **8**, (2019).  
797
- 798 30. Baarda BI, Zielke RA, Le Van A, Jerse AE, Sikora AE. *Neisseria gonorrhoeae* MlaA  
799 influences gonococcal virulence and membrane vesicle production. *PLoS Pathog*  
800 **15**, e1007385 (2019).  
801
- 802 31. Hughes GW, *et al.* Evidence for phospholipid export from the bacterial inner  
803 membrane by the Mla ABC transport system. *Nat Microbiol*, (2019).  
804
- 805 32. Chen L, Duan KM. A PhoPQ-Regulated ABC Transporter System Exports  
806 Tetracycline in *Pseudomonas aeruginosa*. *Antimicrob Agents Ch* **60**, 3016-3024  
807 (2016).  
808
- 809 33. Calero P, Jensen SI, Bojanovic K, Lennen RM, Koza A, Nielsen AT. Genome-wide  
810 identification of tolerance mechanisms toward p-coumaric acid in *Pseudomonas*  
811 *putida*. *Biotechnol Bioeng* **115**, 762-774 (2018).  
812
- 813 34. Kim K, Lee S, Lee K, Lim D. Isolation and characterization of toluene-sensitive  
814 mutants from the toluene-resistant bacterium *Pseudomonas putida* GM73. *J*  
815 *Bacteriol* **180**, 3692-3696 (1998).  
816



- 817 35. Munguia J, *et al.* The Mla pathway is critical for *Pseudomonas aeruginosa*  
818 resistance to outer membrane permeabilization and host innate immune  
819 clearance. *J Mol Med (Berl)* **95**, 1127-1136 (2017).  
820
- 821 36. Krebs WG, Alexandrov V, Wilson CA, Echols N, Yu H, Gerstein M. Normal mode  
822 analysis of macromolecular motions in a database framework: developing mode  
823 concentration as a useful classifying statistic. *Proteins* **48**, 682-695 (2002).  
824
- 825 37. Suhre K, Sanejouand Y-H. ElNémo: a normal mode web server for protein  
826 movement analysis and the generation of templates for molecular replacement.  
827 *Nucleic Acids Res* **32**, W610-W614 (2004).  
828
- 829 38. Fukami-Kobayashi K, Tateno Y, Nishikawa K. Domain dislocation: a change of  
830 core structure in periplasmic binding proteins in their evolutionary history.  
831 *Journal of Molecular Biology* **286**, 279-290 (1999).  
832
- 833 39. Scheepers GH, Lycklama A Nijeholt JA, Poolman B. An updated structural  
834 classification of substrate-binding proteins. *FEBS letters* **590**, 4393-4401 (2016).  
835
- 836 40. Nick Pace C, Martin Scholtz J. A Helix Propensity Scale Based on Experimental  
837 Studies of Peptides and Proteins. *Biophys J* **75**, 422-427 (1998).  
838
- 839 41. Oursel D, Loutelier-Bourhis C, Orange N, Chevalier S, Norris V, Lange CM. Lipid  
840 composition of membranes of *Escherichia coli* by liquid chromatography/tandem  
841 mass spectrometry using negative electrospray ionization. *Rapid Commun Mass*  
842 *Sp* **21**, 1721-1728 (2007).  
843
- 844 42. Gidden J, Denson J, Liyanage R, Ivey DM, Lay JO. Lipid compositions in *Escherichia*  
845 *coli* and *Bacillus subtilis* during growth as determined by MALDI-TOF and  
846 TOF/TOF mass spectrometry. *Int J Mass Spectrom* **283**, 178-184 (2009).  
847
- 848 43. Hamad MA, Skeldon AM, Valvano MA. Construction of Aminoglycoside-Sensitive  
849 *Burkholderia cenocepacia* Strains for Use in Studies of Intracellular Bacteria with  
850 the Gentamicin Protection Assay. *Appl Environ Microb* **76**, 3170-3176 (2010).  
851
- 852 44. Aubert DF, Hamad MA, Valvano MA. A Markerless Deletion Method for Genetic  
853 Manipulation of *Burkholderia cenocepacia* and Other Multidrug-Resistant Gram-  
854 Negative Bacteria. *Host-Bacteria Interactions: Methods and Protocols* **1197**, 311-  
855 327 (2014).  
856
- 857 45. Chua SL, *et al.* Selective labelling and eradication of antibiotic-tolerant bacterial  
858 populations in *Pseudomonas aeruginosa* biofilms. *Nat Commun* **7**, 10750 (2016).  
859
- 860 46. Perez-Martinez I, Haas D. Azithromycin inhibits expression of the GacA-  
861 dependent small RNAs RsmY and RsmZ in *Pseudomonas aeruginosa*. *Antimicrob*  
862 *Agents Chemother* **55**, 3399-3405 (2011).  
863



- 864 47. Raja M. Do small headgroups of phosphatidylethanolamine and phosphatidic acid  
865 lead to a similar folding pattern of the K(+) channel? *J Membr Biol* **242**, 137-143  
866 (2011).  
867
- 868 48. Yao J, Rock CO. Phosphatidic acid synthesis in bacteria. *Biochim Biophys Acta*  
869 **1831**, 495-502 (2013).  
870
- 871 49. Casali N, Riley LW. A phylogenomic analysis of the Actinomycetales mce operons.  
872 *BMC Genomics* **8**, 60 (2007).  
873
- 874 50. Saurin W, Hofnung M, Dassa E. Getting in or out: early segregation between  
875 importers and exporters in the evolution of ATP-binding cassette (ABC)  
876 transporters. *J Mol Evol* **48**, 22-41 (1999).  
877
- 878 51. ter Beek J, Guskov A, Slotboom DJ. Structural diversity of ABC transporters. *The*  
879 *Journal of General Physiology* **143**, 419-435 (2014).  
880
- 881 52. Benning C. A role for lipid trafficking in chloroplast biogenesis. *Prog Lipid Res* **47**,  
882 381-389 (2008).  
883
- 884 53. Qian H, Zhao X, Cao P, Lei J, Yan N, Gong X. Structure of the Human Lipid Exporter  
885 ABCA1. *Cell* **169**, 1228-1239 e1210 (2017).  
886
- 887 54. Wong LH, Copic A, Levine TP. Advances on the Transfer of Lipids by Lipid  
888 Transfer Proteins. *Trends Biochem Sci* **42**, 516-530 (2017).  
889
- 890 55. Powers MJ, Trent MS. Phospholipid retention in the absence of asymmetry  
891 strengthens the outer membrane permeability barrier to last-resort antibiotics.  
892 *Proc Natl Acad Sci U S A* **115**, E8518-E8527 (2018).  
893
- 894 56. Shrivastava R, Jiang X, Chng SS. Outer membrane lipid homeostasis via retrograde  
895 phospholipid transport in *Escherichia coli*. *Mol Microbiol* **106**, 395-408 (2017).  
896
- 897 57. Ercan B, Low WY, Liu X, Chng SS. Characterization of Interactions and  
898 Phospholipid Transfer between Substrate Binding Proteins of the OmpC-Mla  
899 System. *Biochemistry*, (2018).  
900
- 901 58. Epanand RM, Rotem S, Mor A, Berno B, Epanand RF. Bacterial membranes as  
902 predictors of antimicrobial potency. *J Am Chem Soc* **130**, 14346-14352 (2008).  
903
- 904 59. Epanand RF, Savage PB, Epanand RM. Bacterial lipid composition and the  
905 antimicrobial efficacy of cationic steroid compounds (Ceragenins). *Biochim*  
906 *Biophys Acta* **1768**, 2500-2509 (2007).  
907
- 908 60. Hart ME, Champlin FR. Susceptibility to hydrophobic molecules and phospholipid  
909 composition in *Pasteurella multocida* and *Actinobacillus lignieresii*. *Antimicrob*  
910 *Agents Chemother* **32**, 1354-1359 (1988).  
911

- 912 61. Jeukens J, Kukavica-Ibrulj I, Emond-Rheault JG, Freschi L, Levesque RC.  
913 Comparative genomics of a drug-resistant *Pseudomonas aeruginosa* panel and  
914 the challenges of antimicrobial resistance prediction from genomes. *FEMS*  
915 *Microbiol Lett* **364**, (2017).  
916
- 917 62. Delcour AH. Outer membrane permeability and antibiotic resistance. *Biochim*  
918 *Biophys Acta* **1794**, 808-816 (2009).  
919
- 920 63. Lim LM, *et al.* Resurgence of colistin: a review of resistance, toxicity,  
921 pharmacodynamics, and dosing. *Pharmacotherapy* **30**, 1279-1291 (2010).  
922
- 923 64. Miller AK, *et al.* PhoQ mutations promote lipid A modification and polymyxin  
924 resistance of *Pseudomonas aeruginosa* found in colistin-treated cystic fibrosis  
925 patients. *Antimicrob Agents Chemother* **55**, 5761-5769 (2011).  
926
- 927 65. Barrow K, Kwon DH. Alterations in two-component regulatory systems of phoPQ  
928 and pmrAB are associated with polymyxin B resistance in clinical isolates of  
929 *Pseudomonas aeruginosa*. *Antimicrob Agents Chemother* **53**, 5150-5154 (2009).  
930
- 931 66. Macfarlane EL, Kwasnicka A, Hancock RE. Role of *Pseudomonas aeruginosa* PhoP-  
932 phoQ in resistance to antimicrobial cationic peptides and aminoglycosides.  
933 *Microbiology* **146 ( Pt 10)**, 2543-2554 (2000).  
934
- 935 67. Gooderham WJ, *et al.* The sensor kinase PhoQ mediates virulence in  
936 *Pseudomonas aeruginosa*. *Microbiology* **155**, 699-711 (2009).  
937
- 938 68. Moskowitz SM, *et al.* PmrB mutations promote polymyxin resistance of  
939 *Pseudomonas aeruginosa* isolated from colistin-treated cystic fibrosis patients.  
940 *Antimicrob Agents Chemother* **56**, 1019-1030 (2012).  
941
- 942 69. Banin E, Brady KM, Greenberg EP. Chelator-induced dispersal and killing of  
943 *Pseudomonas aeruginosa* cells in a biofilm. *Appl Environ Microbiol* **72**, 2064-2069  
944 (2006).  
945
- 946 70. Han X, Geng J, Zhang L, Lu T. The role of *Escherichia coli* YrbB in the lethal action  
947 of quinolones. *J Antimicrob Chemother* **66**, 323-331 (2011).  
948
- 949 71. Enstrom M, Held K, Ramage B, Brittnacher M, Gallagher L, Manoil C. Genotype-  
950 phenotype associations in a nonmodel prokaryote. *MBio* **3**, (2012).  
951
- 952 72. Cuccui J, *et al.* Development of signature-tagged mutagenesis in *Burkholderia*  
953 *pseudomallei* to identify genes important in survival and pathogenesis. *Infect*  
954 *Immun* **75**, 1186-1195 (2007).  
955
- 956 73. Suzuki T, Murai T, Fukuda I, Tobe T, Yoshikawa M, Sasakawa C. Identification and  
957 characterization of a chromosomal virulence gene, *vacJ*, required for intercellular  
958 spreading of *Shigella flexneri*. *Mol Microbiol* **11**, 31-41 (1994).  
959

- 960 74. Shen L, *et al.* PA2800 plays an important role in both antibiotic susceptibility and  
961 virulence in *Pseudomonas aeruginosa*. *Curr Microbiol* **65**, 601-609 (2012).  
962
- 963 75. Chong ZS, Woo WF, Chng SS. Osmoporin OmpC forms a complex with MlaA to  
964 maintain outer membrane lipid asymmetry in *Escherichia coli*. *Mol Microbiol* **98**,  
965 1133-1146 (2015).  
966
- 967 76. Bligh EG, Dyer WJ. A Rapid Method of Total Lipid Extraction and Purification. *Can*  
968 *J Biochem Phys* **37**, 911-917 (1959).  
969
- 970 77. Flannagan RS, Linn T, Valvano MA. A system for the construction of targeted  
971 unmarked gene deletions in the genus *Burkholderia*. *Environmental Microbiology*  
972 **10**, 1652-1660 (2008).  
973
- 974 78. Loh B, Grant C, Hancock RE. Use of the fluorescent probe 1-N-  
975 phenylnaphthylamine to study the interactions of aminoglycoside antibiotics  
976 with the outer membrane of *Pseudomonas aeruginosa*. *Antimicrob Agents*  
977 *Chemother* **26**, 546-551 (1984).  
978
- 979 79. CLSI. Performance standards for antimicrobial susceptibility testing; 27th  
980 edition. CLSI M100-S27. Clinical and Laboratory Standards Institute, Wayne, PA.,  
981 (2017).  
982
- 983 80. CLSI. Methods for dilution antimicrobial susceptibility tests for bacteria that  
984 grow aerobically; approved standard. Ninth Edition. CLSI M07-A9. Clinical and  
985 Laboratory Standards Institute, Wayne, PA., (2012).  
986
- 987 81. Baquero F. Low-level antibacterial resistance: a gateway to clinical resistance.  
988 *Drug Resist Updat* **4**, 93-105 (2001).  
989
- 990 82. EUCAST. European Committee on Antimicrobial Susceptibility Testing.  
991 Breakpoint tables for interpretation of MICs and zone diameters: Version 9.0  
992 [Online]. (2019).  
993
- 994 83. O'Toole GA, Pratt LA, Watnick PI, Newman DK, Weaver VB, Kolter R. Genetic  
995 approaches to study of biofilms. *Method Enzymol* **310**, 91-109 (1999).  
996  
997  
998  
999

- 1000 **Supplementary Materials:**
- 1001 **Supplementary text S1 with methods**
- 1002 **Figures S1 – S7**
- 1003 **Tables S1 – S4**
- 1004 **Supplementary references**
- 1005

1006 **Table 1.** Antibiotic susceptibility profile of *P. aeruginosa* MDR strains lacking the full  
 1007 *ttg2* operon.

| Antibiotic                          | MIC <sup>†</sup> in µg ml <sup>-1</sup> |               |      |               |            |               |
|-------------------------------------|-----------------------------------------|---------------|------|---------------|------------|---------------|
|                                     | LESB58                                  |               | C17  |               | PAER-10821 |               |
|                                     | WT                                      | $\Delta ttg2$ | WT   | $\Delta ttg2$ | WT         | $\Delta ttg2$ |
| <b>Polypeptides</b>                 |                                         |               |      |               |            |               |
| Colistin                            | 4                                       | 0.125*        | 2    | 0.125*        | 32         | 32            |
| <b>Fluoroquinolones</b>             |                                         |               |      |               |            |               |
| Ciprofloxacin                       | 2                                       | 1             | 256  | 64*           | 256        | 128           |
| Levofloxacin                        | 8                                       | 2*            | 256  | 256           | 256        | 128           |
| Ofloxacin                           | 16                                      | 4*            | >32  | >32           | >32        | >32           |
| Norfloxacin                         | 8                                       | 4             | >256 | >256          | >256       | 256           |
| <b>Tetracyclines</b>                |                                         |               |      |               |            |               |
| Tetracycline                        | 16                                      | 8             | 32   | 16            | 32         | 8*            |
| Minocycline                         | 32                                      | 8*            | 16   | 8             | 32         | 8*            |
| Tigecycline                         | 16                                      | 8             | 64   | 8*            | 32         | 8*            |
| <b>Chloramphenicol</b>              |                                         |               |      |               |            |               |
| Chloramphenicol                     | 32                                      | 32            | 128  | 64            | 128        | 64            |
| <b>Sulfonamides</b>                 |                                         |               |      |               |            |               |
| Trimethoprim-sulphamethoxazole      | 16                                      | 8             | >64  | >64           | >64        | 64            |
| <b>Aminoglycosides</b>              |                                         |               |      |               |            |               |
| Tobramycin                          | 8                                       | 2*            | 64   | 128           | 128        | >128          |
| Amikacin                            | 64                                      | 64            | 8    | 32*           | 32         | 32            |
| Gentamicin                          | 32                                      | 16            | >128 | >128          | >128       | >128          |
| Kanamycin                           | >512                                    | >512          | 256  | 512           | 512        | 512           |
| Streptomycin                        | >64                                     | >64           | >64  | >64           | >64        | >64           |
| <b>Carbapenems (beta-lactam)</b>    |                                         |               |      |               |            |               |
| Imipenem                            | 2                                       | 2             | 32   | 32            | 32         | 64            |
| Meropenem                           | 2                                       | 2             | 32   | 16            | 16         | 16            |
| <b>Cephalosporins (beta-lactam)</b> |                                         |               |      |               |            |               |
| Ceftazidime                         | 256                                     | 256           | 64   | 128           | 16         | 32            |
| <b>Penicillins (beta-lactam)</b>    |                                         |               |      |               |            |               |
| Piperacillin                        | 256                                     | 256           | 256  | >256          | 128        | 256           |
| Piperacillin-tazobactam             | 128                                     | 128           | 256  | >256          | 64         | 64            |
| Ticarcillin                         | >256                                    | >256          | >256 | 256           | 64         | 128           |
| Ticarcillin-clavulanic acid         | >32                                     | >32           | >32  | >32           | >32        | >32           |

1008 <sup>†</sup> Minimum inhibitory concentration (MIC) determined by the broth microdilution  
 1009 method. MICs were confirmed by two or three independent replicates and MIC  
 1010 differences greater than 2-fold with respect to the corresponding wild type strain were  
 1011 considered significant (indicated with an asterisk).

1012

1013 **Figures**

1014 **Figure 1**

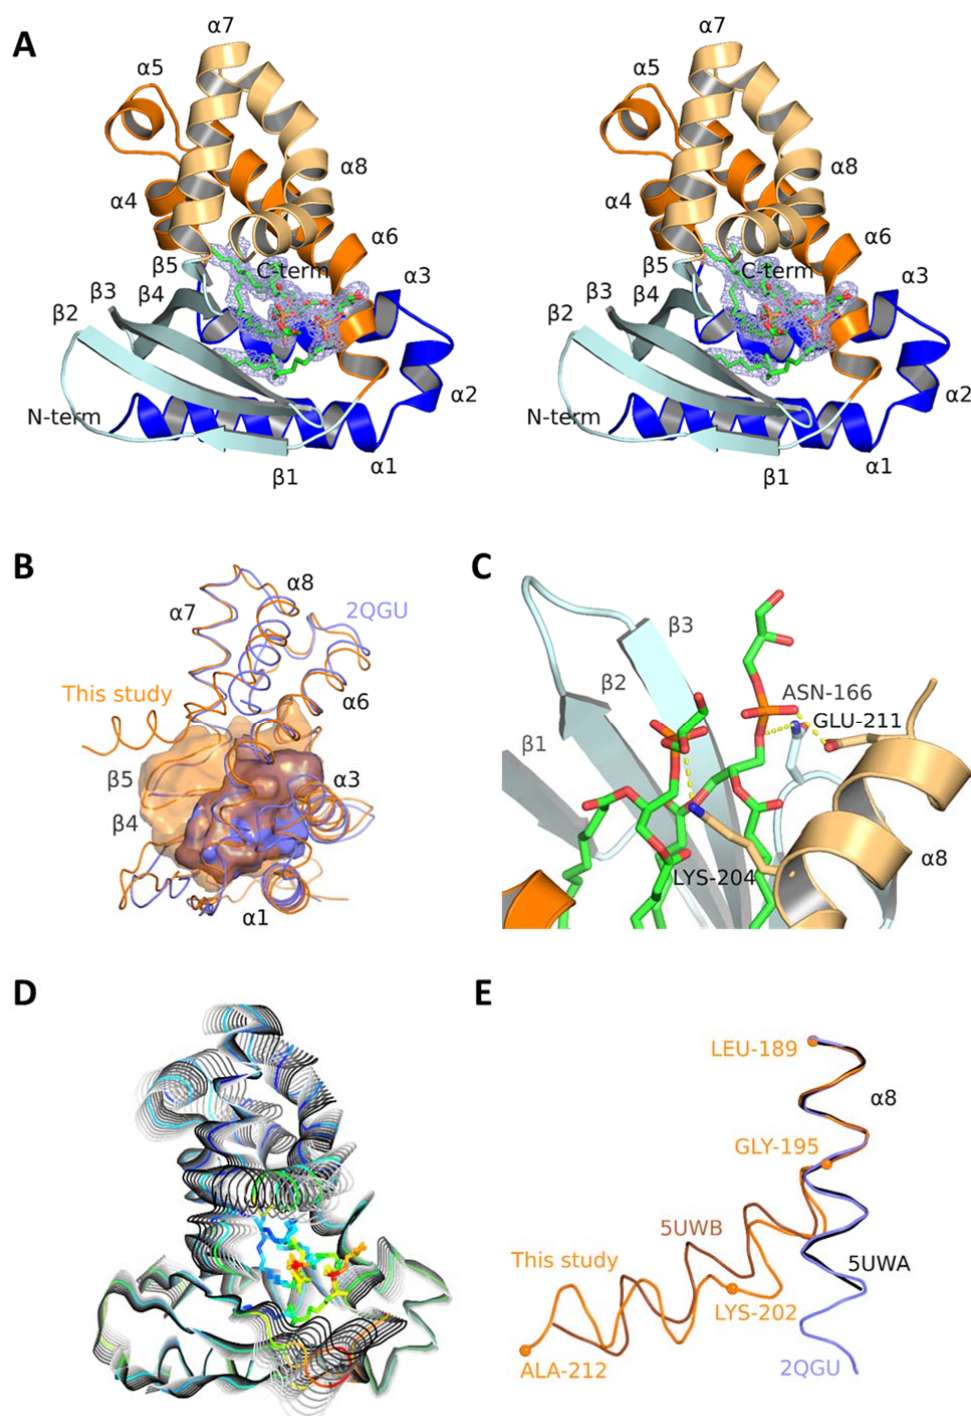

1015

1016 **Figure 1. Ttg2D<sub>Pae</sub> binds two phospholipids simultaneously.** (A) Crystal structure

1017 of Ttg2D<sub>Pae</sub> with two PG (16:0/cy17:0) bound (stereo view). The feature-enhanced

1018 electron-density map around the lipids, shown as a mesh, is contoured at  $1.5\sigma$ . The

1019 cartoon representation of the protein is colored according to the CATH domains:  
1020 domain 1 in blue and domain 2 in orange, dark tones for segments 1 and light tones  
1021 for segments 2 in each domain (see Fig. S1). (B) Superposition of the structures of  
1022 Ttg2D from *P. aeruginosa* (orange) and *R. solanacearum* (slate). The cavities of both  
1023 proteins are shown as semi-transparent surfaces (side-view from the right of A). (C)  
1024 Interactions between the lipid head group and the protein. (D) Protein motions along  
1025 the normal mode 7. The colors represent the *B*-factors (spectrum blue to red for  
1026 lowest to highest values). (E) Superposition of helix  $\alpha 8$  of Ttg2D from *P. aeruginosa*  
1027 (orange), *P. putida* (brown), *R. solanacearum* (slate) and *E. coli* (black).



1028 **Figure 2**

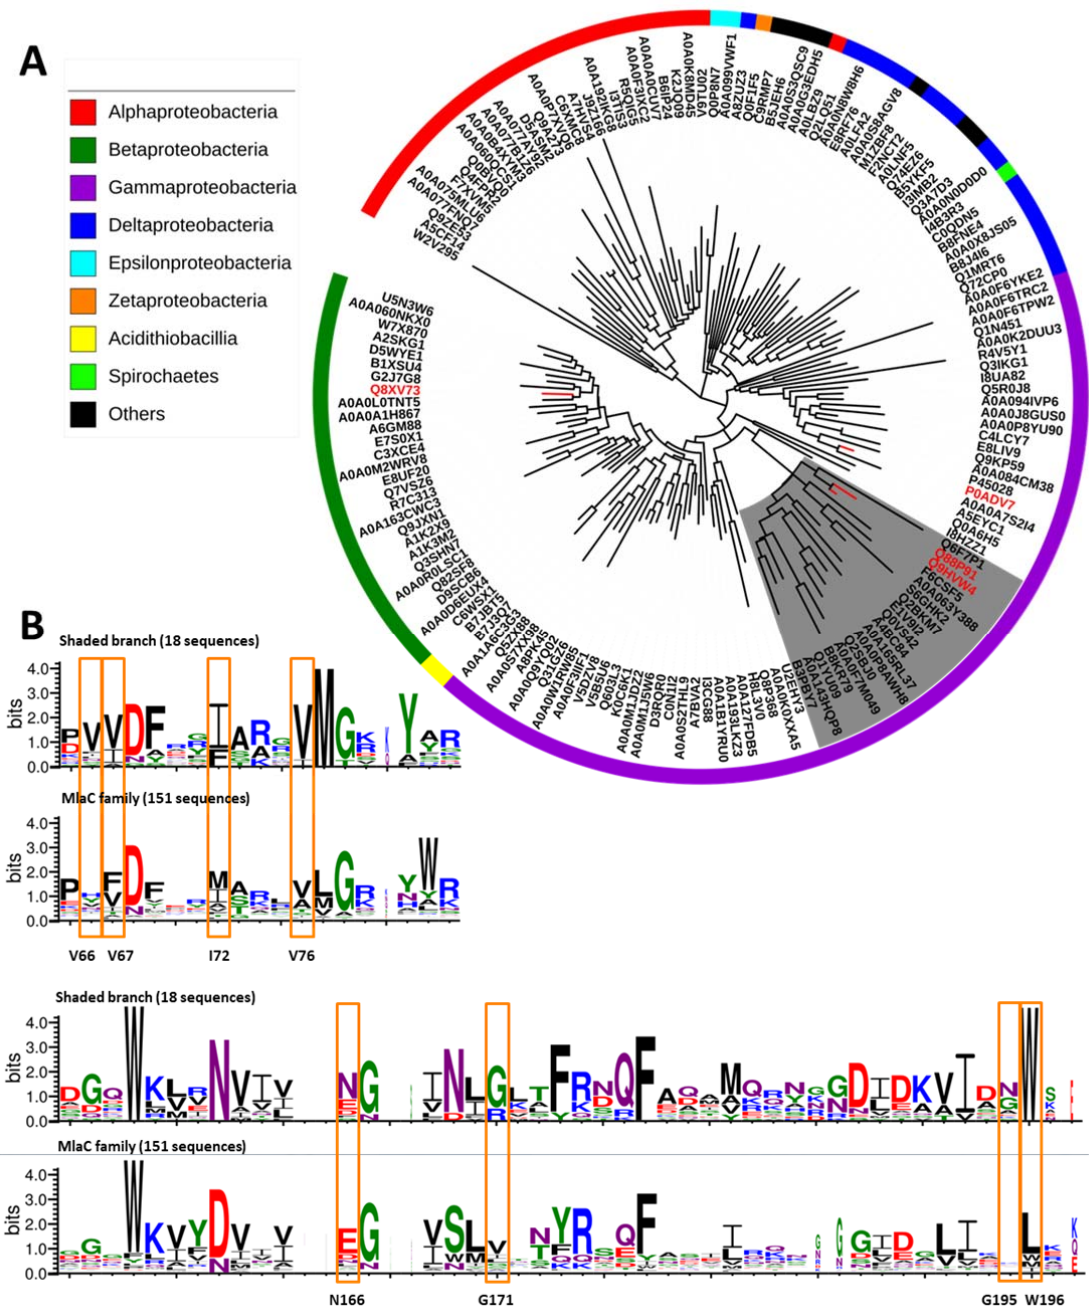

1029  
 1030 **Figure 2. Sequence diversity among MlaC family proteins.** (A) Phylogeny of 151  
 1031 representative amino-acid sequences belonging to the Pfam family MlaC (PF05494)  
 1032 and identified across different Gram-negative species (bacterial classes are shown  
 1033 with different colors). The maximum likelihood tree was calculated with the LG+G+F  
 1034 model on MEGA 7, and visualized and annotated with iTOL. UniProt codes are used



1035 to identify each sequence, and those proteins with known 3D structure are indicated  
1036 in red (P0ADV7 in *E. coli*, Q8XV73 in *R. solanacearum*, Q88P91 in *P. putida* and  
1037 Q9HVV4 in *P. aeruginosa*). The branch corresponding to proteins that we predict to  
1038 bind two diacyl lipids is shaded. This branch comprises sequences from different  
1039 species belonging to four orders of Gamma-proteobacteria (*Pseudomonadales*,  
1040 *Alteromonadales*, *Cellvibrionales* and *Oceanospirillales*). (B) Aligned sequence logos  
1041 for the MlaC family in two sequence regions for the whole set of 151 representative  
1042 sequences and for a sub-set of sequences corresponding to the shaded branch of  
1043 the tree (18 sequences). At a given position, the height of a residue is proportional to  
1044 its frequency. Residues that would distinguish the proteins binding one and two  
1045 diacyl lipids are boxed.

1046

1047 **Figure 3**

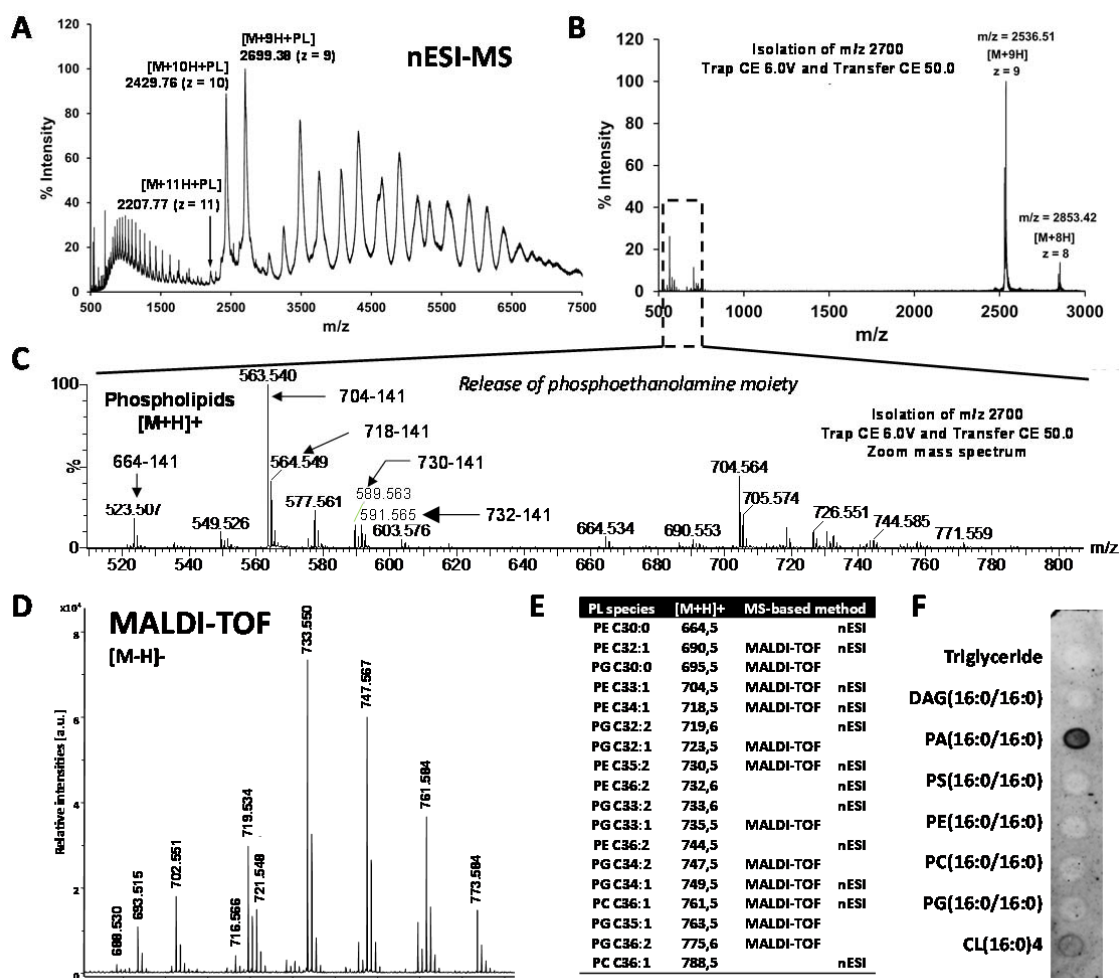

1048 **Figure 3. Ttg2D<sub>Pae</sub> is a promiscuous phospholipid-binding protein.** (A) Positive  
 1049 mode, non-denaturing, ESI mass spectrum of Ttg2D<sub>Pae</sub> expressed in *E. coli*. The  
 1050 most represented species in native conditions are proteins containing at least two  
 1051 phospholipid (PL) molecules. (B) Mass spectrum fragmentation of isolated ion m/z =  
 1052 2700 (z = 9), PLs are expected in the range 600-800 Da. (C) Zoom of the MS/MS  
 1053 spectrum in positive mode showing the most abundant glycerophospholipids  
 1054 released from Ttg2D<sub>Pae</sub> under non-denaturing MS dissociation conditions. The major  
 1055 PLs detected show a loss of 141 Da, after MS/MS experiment, that corresponds to  
 1056 the release of a phosphoethanolamine (PE) moiety. (D) Negative ion mode mass  
 1057 spectrum under denaturing conditions of glycerophospholipids released by Ttg2D<sub>Pae</sub>.  
 1058

1059 No other PLs were detected (data not shown). (E) Assignments of peaks in the mass  
1060 spectra to different PL species (see methods). Numbers associated to each species  
1061 indicate the number of carbon atoms and double bonds, respectively, in the fatty acid  
1062 side chains. The most abundant ions detected by both methods correspond to two  
1063 glycerophospholipid classes: phosphatidylglycerols (PG) and PE.  
1064 Phosphatidylcholine (PC) species were also observed. (F) Ttg2D<sub>Pae</sub> binds  
1065 phospholipids in vitro. The purified delipidated protein was overlaid in an Echelon P-  
1066 6002 membrane lipid strip. PA, phosphatidic acid; CL, cardiolipin; DAG,  
1067 diacylglycerol; PS, phosphatidylserine.  
1068

1069 **Figure 4**

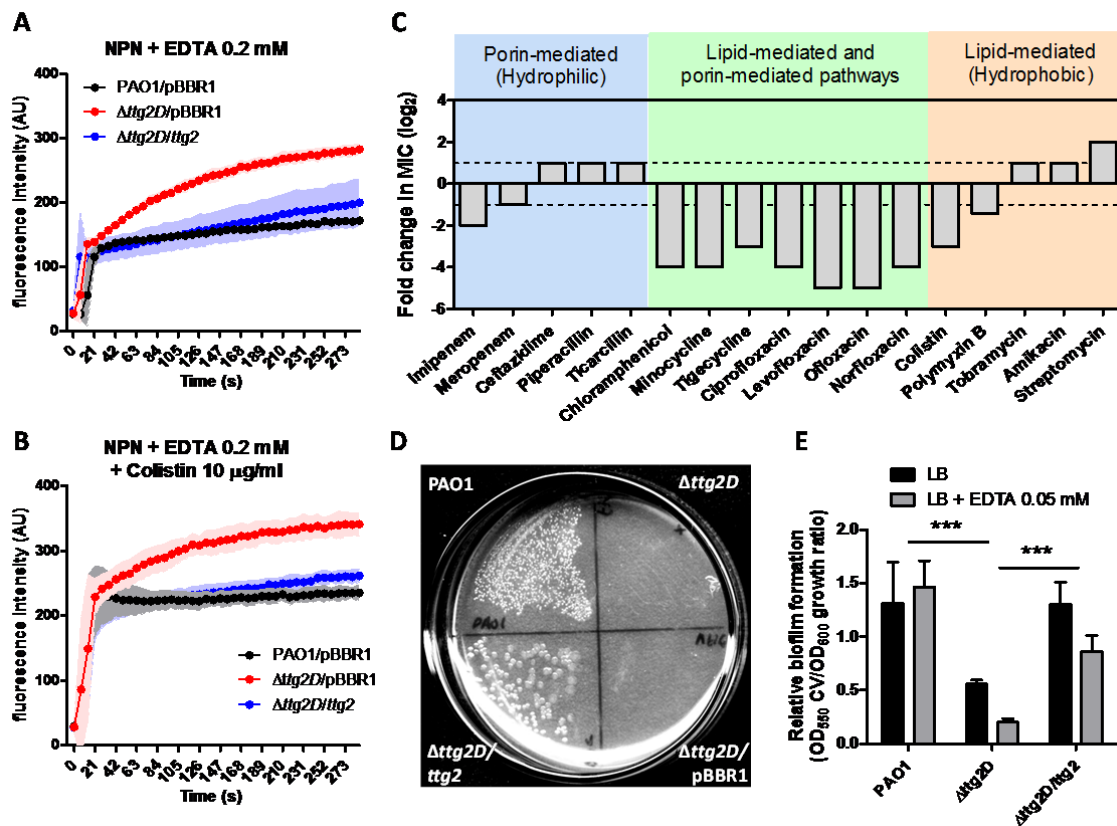

1070

1071

**Figure 4. Phenotypic changes in the  $\Delta ttg2D$  *P. aeruginosa* mutant denote**

1072

**destabilization of its outer membrane. (A and B) Ability of EDTA and colistin to**

1073

**permeabilize the outer membrane (NPN assay) of the native, mutant and**

1074

**complemented PAO1. (C) Relative change of the  $\Delta ttg2D$  mutant MIC (minimum**

1075

**inhibitory concentration) for antibiotics of different classes grouped according to their**

1076

**cell entry mechanism. Fold changes were determined with respect to the PAO1 wild**

1077

**type, represented as dotted lines. (D) Growth in LBMg plates overlaid with 100% *p*-**

1078

**xylene. Under this condition the growth was assessed following incubation at 37°C**

1079

**for 24h. The image is representative of duplicate experiments. (E) Relative biofilm**

1080

**formation determined by crystal violet (CV) staining for  $\Delta ttg2D$  mutant and control**

1081

**strains in LB medium with and without EDTA. Asterisks denote the significance of the**

1082

**data between groups (one-way ANOVA with Tukey's multiple comparison test). In all**

1083

**panels pBBR1 indicates insertion of pBBR1MCS-5 vector alone as a control.**

1084 **Figure 5**

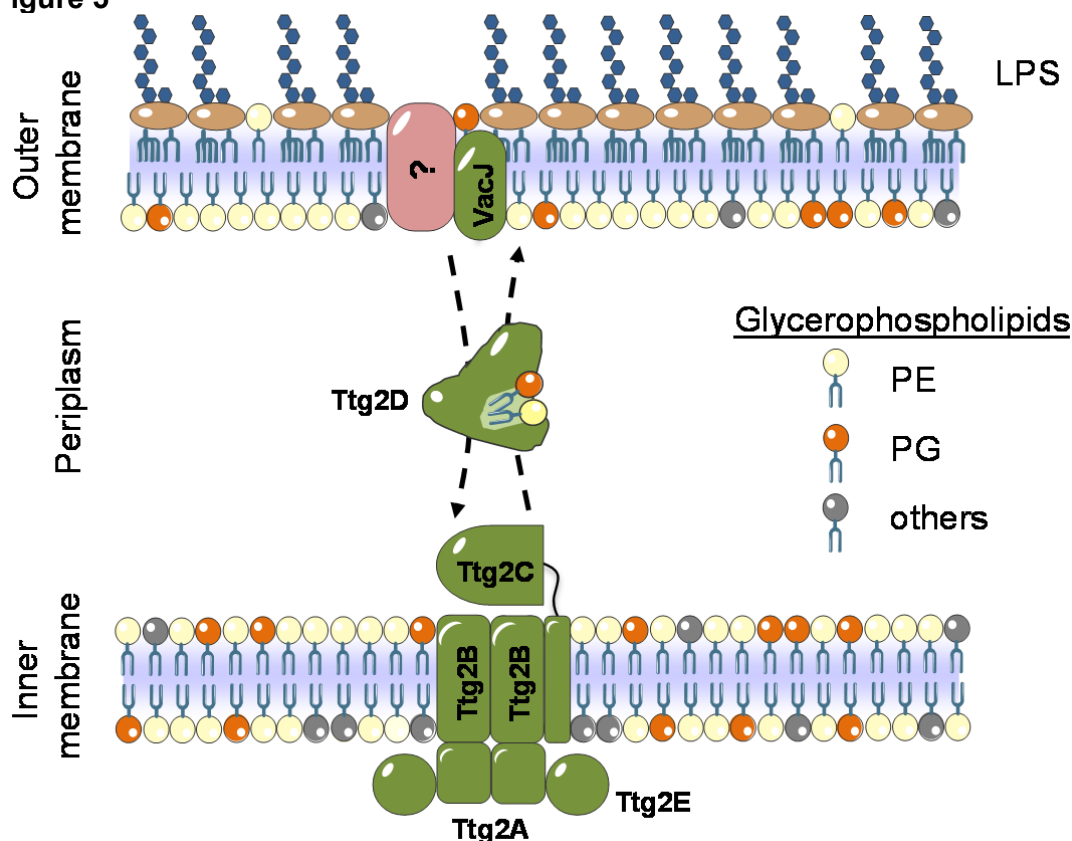

1085

1086

1087

1088

1089

1090

1091

1092

1093

1094

1095

1096

1097

1098

**Figure 5. Proposed model of the Ttg2 system in *P. aeruginosa*.** The soluble, periplasmic substrate binding protein Ttg2D and its orthologs in other species are thought to transport mislocalized phospholipids from the outer leaflet of the outer membrane (OM) to the inner membrane (IM) complex Ttg2ABCE across the periplasm<sup>21</sup>. In *P. aeruginosa*, it is not yet known if the VacJ component of the system, which delivers the lipids to Ttg2D, forms a complex with specific porins, as in *E. coli*, to extract the lipids from the membrane. In contrast to the *E. coli* ortholog (MlaC), Ttg2D<sub>Pae</sub> carries two glycerophospholipids and, structure wise, could accommodate a tetra-acyl phospholipid such as cardiolipin. In addition, the protein may carry simultaneously two PL with different head groups. Considering recent studies<sup>29, 31</sup>, the structural signatures of the ATPase and permease models from the ortholog Mla system in *E. coli*<sup>26</sup>, characteristic of importer and exporter ABC cassettes, we propose, in addition to the aforementioned role in retrograde

1099 phospholipid trafficking, a second potential mode of action as an anterograde  
1100 trafficking system (dashed lines) that would contribute to the maintenance of  
1101 phospholipid distribution asymmetry.

1102
